# Supplementary material for: A snapshot of the transition from monogenetic volcanoes to composite volcanoes: case study on the Wulanhada Volcanic Field (northern China)
Source: Copernicus journal article supplement (doi:10.5194/ejm-34-469-2022), 2022-10-20
Supplement: Supplementary file 1 [file ejm-34-469-2022-supplement.zip]

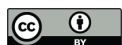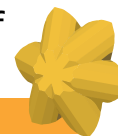

*Supplement of*

**A snapshot of the transition from monogenetic volcanoes to composite volcanoes: case study on the Wulanhada Volcanic Field (northern China)**

**Diao Luo et al.**

*Correspondence to:* Tong Hou ([thou@cugb.edu.cn](mailto:thou@cugb.edu.cn))

- [ejm-34-469-2022-supplement-title-page.pdf](#)
- [Supplementary Tables.xlsx](#)

The copyright of individual parts of the supplement might differ from the article licence.
