# Supplementary material for: A snapshot of the transition from monogenetic volcanoes to composite volcanoes: case study on the Wulanhada Volcanic Field (northern China)
Source: Copernicus journal article supplement (doi:10.5194/ejm-34-469-2022), 2022-10-20
Supplement: Supplementary file 1 [file Supplementary Tables.xlsx]

## Sheet: Table S1
Table S1 Bulk-rock major and trace element compositions of WVF rocks.
Volcano	Beiliandanlu						Zhongliandanlu					Nanliandanlu					Huoshaoshan						Heinaobao				Hongshan
Sample	BLDL1-2	BLDL01-8	BLDL-1-4	BLDL-1-7	BLDL-1-10	BLDL-1-11	ZLDL1-3	ZLDL01-6	ZLDL3-1	ZLDL3-2	ZLDL3-3	NLDL1-1	NLDL01-2	NLDL-2-1	NLDL2-6	NLDL2-9	HSS01	HSS02	HSS05	HSS06	HSS07	HSS08	HNB-1-1	HNB-1-2	HNB-1-5	HNB-ZM	HS01-1	HS01-2	HS03	HS04	HS05
Type	lava	lava	lava	scoria	scoria	lava	scoria	scoria	lava	lava	lava	lava	lava	lava	scoria	scoria	scoria	scoria	scoria	scoria	lava	lava	scoria	scoria	lava	lava	scoria	lava	scoria	lava	scoria
Latitude	41°36′59.24″N	41°36′58.07″N	41°36′56.12″N	41°36′55.58″N	41°36′54.38″N	41°36′54.12″N	41°35′30.95″N	41°35′28.15″N	41°35′25.60″N	41°35′26.91″N	41°35′30.72″N	41°35′6.48″N	41°35′4.70″N	41°35′2.93″N	41°34′59.34″N	41°35′2.82″N	41°37′31.70″N	41°37′31.53″N	41°37′29.10″N	41°37′27.10″N	41°37′26.90″N	41°37′26.51″N	41°36′15.54″N	41°36′17.11″N	41°36′17.48″N	41°36′16.51″N	41°37′16.16″N	41°37′15.51″N	41°37′15.05″N	41°37′14.85″N	41°37′14.88″N
Longitude	113°9′58.77″E	113°9′59.04″E	113°9′56.27″E	113°9'57.96"E	113°9'51.36"E	113°9′54.80″E	113°7′16.33″E	113°7′17.17″E	113°7′15.59″E	113°7′11.89″E	113°7′10.34″E	113°6′40.86″E	113°6′43.15″E	113°6′42.88″E	113°6′41.51″E	113°6′40.43″E	113°12′10.36″E	113°12′8.45″E	113°12′9.58″E	113°12′17.31″E	113°12′18.15″E	113°12′17.51″E	113°8′2.98″E	113°7′59.90″E	113°8′3.28″E	113°8′4.62″E	113°13′10.45″E	113°13′11.75″E	113°13′13.27″E	113°13′14.14″E	113°13′12.27″E
SiO2	47.8626	47.7796	47.431	47.773	47.842	47.789	46.85	47.2388	47.9464	47.9417	47.7939	49.4838	49.1648	48.536	50.2526	49.663	47.342	48.9158	49.8648	49.1642	49.66	49.184	49.023	49.2422	49.331	49.3422	47.789	47.79	48.584	48.884	48.766
TiO2	2.5329	2.5111	2.654	2.663	2.638	2.659	2.4824	2.4791	2.5481	2.4385	2.5359	2.2246	2.267	2.286	2.2224	2.2267	2.545	2.4478	2.3895	2.2969	2.443	2.434	2.544	2.4492	2.519	2.4024	2.666	2.652	2.589	2.507	2.582
Al2O3	16.8027	16.6747	16.665	16.785	16.752	16.809	16.3658	16.1595	16.9358	16.7472	16.9832	15.5407	15.4748	15.13	15.8603	15.4955	16.231	16.7347	16.7005	16.303	16.419	16.287	16.86	16.8905	16.88	16.8908	16.891	16.825	16.812	16.542	16.698
TFe2O3	10.7826	10.8109	11.346	11.38	11.264	11.281	10.6836	10.7297	11.0026	10.8924	10.9714	11.5913	11.5952	11.966	11.3749	11.528	11.398	11.1496	10.655	10.3783	11.111	11.117	11.532	10.9876	11.513	10.9066	11.644	11.646	11.336	11.163	11.302
MnO	0.1464	0.1459	0.137	0.138	0.138	0.139	0.1462	0.1463	0.1484	0.1463	0.1536	0.1501	0.1512	0.144	0.1472	0.151	0.137	0.1458	0.1475	0.1414	0.136	0.135	0.14	0.1479	0.14	0.1463	0.139	0.139	0.136	0.137	0.138
MgO	4.0799	4.0873	4.153	4.178	4.087	4.135	4.5828	4.6176	3.9438	3.8479	3.9052	5.4435	5.4144	6.027	4.8628	5.2453	4.017	4.0194	3.8719	3.896	3.937	3.981	4.144	3.9994	4.076	4.0075	4.109	4.096	4.006	3.956	3.99
CaO	7.9498	7.9192	7.817	7.853	7.88	7.817	8.6617	8.7107	7.8138	7.6472	7.8238	8.3143	8.3787	8.409	8.1396	8.1311	8.476	7.9313	7.7243	8.394	7.793	8.234	7.725	7.8753	7.677	7.7324	7.649	7.657	7.652	7.568	7.62
Na2O	5.6292	5.6089	5.376	5.348	5.241	5.283	5.024	5.2139	5.1925	4.8832	5.0208	4.365	4.5457	4.139	4.4894	4.4144	4.243	4.8757	5.0483	4.6763	4.771	4.529	4.753	4.9084	4.584	4.7367	5.271	5.234	4.971	4.809	4.979
K2O	2.9501	2.9402	3.01	3.021	2.995	3.01	2.69	2.7618	2.7644	2.6838	2.7571	1.7054	1.7536	1.722	1.6995	1.7329	2.369	2.3997	2.3172	2.4068	2.494	2.469	2.486	2.3039	2.606	2.5261	2.83	2.792	2.833	2.798	2.818
P2O5	0.9324	0.935	0.966	0.959	0.953	0.96	0.8801	0.8809	0.9218	0.8799	0.9526	0.5881	0.6019	0.56	0.5825	0.566	0.766	0.788	0.7631	0.7429	0.768	0.765	0.8	0.7855	0.806	0.7792	0.921	0.914	0.887	0.855	0.879
LOI	-0.171363	-0.296736	-0.04	0.04	0.21	-0.11	0.604996	0.24584	-0.392157	0.539084	4	-0.159649	-0.0192419	0.4	-0.27933	0.353218	1.69	-0.0910415	-0.233781	0.815271	0.06	0.64	0.16	-0.134953	-0.1	-0.238237	-0.035	-0.03	-0.045	-0.047	-0.039
TOTAL	99.6686	99.4128	99.555	100.098	99.79	99.882	98.3666	98.9383	99.2176	98.1081	98.8975	99.4068	99.3473	98.919	99.6312	99.1539	97.524	99.4078	99.4821	98.3998	99.532	99.135	100.007	99.5899	100.132	99.4702	99.909	99.745	99.806	99.219	99.772
Li	8.8724	6.9226	4.8004	8.07166	4.3812	4.5158	10.03	9.21757	9.21209	12.01	9.49627	4.795	20.3498	5.6796	5.3642	5.6834	9.39351	9.26138	9.46661	9.78576	10.0674	9.14	9.14979	9.33	10.0471	11.53	11.6191	13.32	11.77	11.6047	11.4316
Be	2.67764	2.019	1.969	1.73259	1.582	1.505	2.474	2.67514	2.67869	2.763	2.64611	2.189	2.47879	2.59	2.932	2.963	2.60648	2.54469	2.46532	2.48799	2.36161	2.871	2.30679	2.223	2.2679	2.271	2.31389	2.487	2.456	2.22781	2.25648
Sc	13.8003	17.8346	18.2227	18.3546	16.0879	15.3853	10.7731	13.4601	13.5584	11.1145	13.8959	17.0401	18.7667	11.8915	15.9049	11.8107	13.9958	13.9834	13.2923	13.5034	14.5254	11.9483	13.9493	11.4559	14.41	11.5559	13.5516	11.2683	11.5297	13.622	13.8131
V	184.004	212.8	213.2	178.579	199.8	192.9	194.4	182.73	185.897	202.6	183.393	204.8	160.876	212.1	215.8	200.9	190.279	190.583	175.864	181.665	187.23	202.6	186.958	196.3	188.842	202.8	174.398	201.1	197.2	181.402	181.066
Cr	13.3132	515.8	101.1	136.904	682.8	115.7	13.53	12.8634	11.2032	14.56	18.6011	154.4	69.4888	15.64	58.74	14.94	11.8731	13.1689	15.3988	13.6724	17.6343	26.01	17.7121	17.79	16.2005	27.71	21.9559	22.61	20.17	17.8752	16.3849
Mn	1186.71	1139	1152	1209.81	1127	1024	1015	1169.68	1189.03	1029	1190.12	1132	1085.62	1140	1071	1119	1227.88	1235.64	1162.18	1199.3	1203.88	1050	1165.7	1027	1217.46	1025	1116.29	1048	1019	1155.56	1149.85
Co	34.6052	44.98	45.88	43.142	43.49	39.41	35.77	34.5204	34.9226	36.34	34.0037	45.57	24.602	37.81	39.87	36.73	35.4192	36.317	33.5953	34.3771	34.5588	37.29	33.6274	36.06	34.5825	36.52	31.0393	35.74	35.6	33.0074	32.7148
Ni	22.228	70.39	68.85	75.6825	63.83	44.11	25.03	21.7189	21.6059	25.99	21.1689	98.48	30.2709	22.71	37.16	22.86	19.1337	19.1437	20.191	19.5487	26.2665	25.16	19.3552	24.34	20.3127	31.2	32.5008	26.78	24.87	21.9132	20.155
Cu	40.584	67	52.2	47.1375	44.1	19.68	56.8	39.606	40.7822	59.4	39.8593	53	20.0535	37.4	58.9	44.2	30.6235	33.1865	93.9945	32.2392	28.5765	70.6	28.4711	44.3	26.0399	40.2	25.5448	45.8	43	30.1073	26.7487
Zn	118.948	127.5	129.7	114.213	129.3	97	122	120.249	120.069	126.8	118.078	130.3	164.874	137	137.2	130.7	123.886	125.716	144.294	120.949	121.038	122.8	116.303	121.6	123.877	124.7	115	121.1	120.9	117.582	116.149
Ga	28.0774	22.3	22.93	23.9153	22.09	20.73	22.59	27.9985	28.215	23.17	28.1008	22.1	33.1928	24.24	23.32	23.87	28.4273	28.5152	27.0844	27.2083	27.1936	22.9	26.7418	22.53	27.165	22.82	25.8281	22.99	22.46	26.337	26.2658
Rb	40.1394	19.7279	20.2664	24.4035	20.5316	19.3633	28.9331	39.8219	40.1196	29.3474	40.4184	21.2524	130.012	27.682	27.6157	27.392	37.1447	37.3765	39.8372	38.8271	34.6245	22.6444	36.1931	26.9031	33.3069	24.3595	37.6931	27.044	27.8145	38.8863	38.0106
Sr	1136.13	530	561.8	686.305	545.3	556.8	795.7	1125.73	1137.81	803.7	1123.77	542.3	998.873	798	797.3	772.4	1058.31	1056.38	1010.05	1034.54	953.402	697.8	965.967	688	931.831	688.1	817.498	667	670.8	870.416	885.594
Y	23.0656	20.98	21.75	21.2782	20.92	16.27	20.08	22.8538	22.9234	20.71	23.0184	21.18	31.1959	22.22	21.4	22.2	23.4672	23.7193	23.0042	23.073	22.6384	20.81	22.6693	20.23	23.3013	20.66	22.5733	20.87	20.79	23.2168	23.1596
Zr	264.253	186.4	194.9	182.903	189.3	149.3	242	265.491	264.636	243.9	268.078	185.7	513.092	250.9	239.2	247.5	256.212	264.624	250.748	259.435	239.292	223.6	239.466	222.4	237.64	222.1	242.184	220.7	225	236.325	234.874
Nb	76.9244	36.13	37.59	43.1428	35.06	33.31	60.23	78.112	77.3976	60.94	76.0609	35.57	33.7208	59.47	58.96	57.91	73.5356	74.204	67.4275	69.6459	60.7176	49.05	60.1121	47.55	61.6613	48.18	55.8248	47.3	46.61	57.5199	57.918
Mo	6.12569	3.444	3.132	3.00187	3.155	2.653	4.992	6.06327	6.15216	5.654	5.98375	3.298	2.40121	4.693	5.566	7.451	5.4014	5.44473	5.23881	5.40643	4.52782	6.656	4.57869	4.856	3.96409	3.945	2.49524	3.407	4.136	3.98406	4.34139
Sn	2.01126	1.702	1.652	1.65049	1.685	1.257	1.845	2.05098	2.0617	1.96	2.01916	1.887	1.81596	2.099	1.796	2.082	1.96351	1.98301	1.97364	1.95912	1.86768	1.834	1.88672	1.836	1.91592	1.798	1.87196	1.775	1.85	1.78718	1.81017
Cs	0.505286	0.278	0.289	0.280846	0.364	0.174	0.49	0.484869	0.486544	0.715	0.573871	0.392	2.68013	0.491	0.527	0.562	0.421063	0.430159	0.816298	0.637871	0.489679	0.334	0.454195	0.476	0.46863	0.417	0.881992	0.679	0.73	0.74921	0.766448
Ba	624.127	408.6	425.4	393.606	426.3	555.7	588.6	618.934	624.96	616	628.214	424.9	1926.85	689.8	583.9	643.2	597.512	610.805	595.735	597.613	570.982	580.6	599.206	583.1	676.163	575	565.797	565.9	584	582.99	588.85
La	42.8717	28.72	28.78	27.3727	28.15	25.04	41.68	42.9826	43.4638	41.94	43.1581	28.71	102.95	42.2	40.65	41.96	40.1224	40.9612	40.5143	40.3259	37.3387	39.82	40.2161	38.1	38.4879	38.55	36.8322	37.14	38.54	38.4159	38.0017
Ce	81.9868	57.26	57.53	53.1317	57.09	49.25	81.73	82.0932	82.9469	82.04	82.35	56.66	209.093	82.47	78.34	82.42	76.9967	78.0453	77.5434	77.874	72.1767	77.98	77.128	74.71	74.6267	75.96	71.3001	74.06	75.72	74.2749	73.6877
Pr	9.40497	6.812	6.733	6.40369	6.637	5.79	9.393	9.44158	9.55979	9.365	9.48431	6.93	24.0552	9.391	9.06	9.551	9.03805	9.03221	8.97876	8.93568	8.34173	8.846	8.84503	8.65	8.67576	8.911	8.27072	8.512	8.792	8.61241	8.57419
Nd	40.3842	30.57	30.04	27.8497	30.17	25.33	40.33	40.4035	40.9061	40.53	40.0179	30.23	96.7916	40.12	39.81	41.06	38.2624	38.938	38.3263	38.2918	35.8516	38.09	37.4571	36.87	36.8347	37.57	35.0586	36.22	38.39	36.2887	36.4688
Sm	8.04404	6.4	6.218	6.13479	6.489	5.155	8.003	7.98943	8.01219	7.962	7.87146	6.372	14.9122	7.969	7.653	7.928	7.45251	7.73481	7.61411	7.61733	7.23076	7.393	7.40197	7.506	7.30117	7.425	7.00858	7.155	7.022	7.30729	7.33431
Eu	2.63933	2.19938	2.19419	2.06527	2.12186	1.72216	2.62603	2.67329	2.6502	2.53593	2.64543	2.15337	3.998	2.56672	2.60176	2.6619	2.54239	2.63878	2.44795	2.48474	2.37458	2.54298	2.41776	2.37806	2.49684	2.48004	2.26342	2.3594	2.37972	2.38094	2.35719
Gd	7.22685	6.00685	5.87103	5.81767	5.59229	4.55196	6.53998	7.1922	7.25534	6.60681	7.08872	5.79344	11.2771	6.59534	6.47072	6.79845	6.88189	7.17642	6.72634	6.86589	6.55459	6.48584	6.75484	6.07476	6.90683	6.30021	6.45216	6.18024	6.03833	6.63095	6.59128
Tb	0.967035	0.835996	0.815071	0.826646	0.810807	0.653624	0.8842	0.960355	0.954373	0.908795	0.961062	0.840686	1.34332	0.943626	0.847255	0.91872	0.922961	0.956022	0.936642	0.928878	0.913479	0.884744	0.919547	0.878218	0.922846	0.926798	0.879833	0.828536	0.889135	0.920373	0.927938
Dy	4.9526	4.638	4.704	4.52779	4.595	3.721	4.714	5.00874	5.02372	4.869	4.98101	4.653	6.3547	4.965	4.913	5.076	4.81282	4.99609	4.9448	4.9484	4.81854	4.996	4.8758	4.714	4.8692	4.73	4.72526	4.609	4.814	4.86116	4.86914
Ho	0.839428	0.782	0.747	0.784714	0.799	0.604	0.767	0.847918	0.851051	0.827	0.831621	0.788	1.09506	0.829	0.809	0.871	0.820128	0.855223	0.85818	0.836555	0.830766	0.871	0.842461	0.767	0.839588	0.782	0.817179	0.785	0.796	0.848394	0.851266
Er	1.99652	2.05	2.108	1.91251	2.157	1.656	1.983	1.99451	2.0012	1.958	1.98621	2.029	2.8021	2.07	1.952	2.262	1.98987	2.04026	2.06164	1.99808	1.97787	2.225	2.04234	2.025	2.02221	2.007	2.00595	2.072	2.265	2.04958	2.07587
Tm	0.255367	0.259	0.256	0.253387	0.268	0.202	0.235	0.252687	0.253582	0.232	0.256685	0.244	0.36577	0.252	0.251	0.25	0.252568	0.262884	0.271288	0.26611	0.261158	0.261	0.263585	0.247	0.266308	0.265	0.266369	0.252	0.253	0.278408	0.276501
Yb	1.40053	1.589	1.458	1.4256	1.509	1.195	1.388	1.40613	1.41945	1.502	1.42913	1.556	2.15729	1.629	1.38	1.415	1.40604	1.47391	1.53244	1.50126	1.47766	1.517	1.51093	1.378	1.5344	1.408	1.52045	1.427	1.462	1.56744	1.54536
Lu	0.187875	0.202	0.198	0.194446	0.21	0.178	0.193	0.192756	0.193752	0.198	0.198508	0.217	0.313123	0.203	0.196	0.203	0.193764	0.204089	0.209746	0.208347	0.20309	0.228	0.20692	0.201	0.208725	0.206	0.215715	0.214	0.228	0.219329	0.220082
Hf	5.54846	4.657	4.616	4.2078	4.825	3.734	5.623	5.60231	5.56496	5.575	5.65043	4.881	10.7426	5.601	5.561	5.458	5.22613	5.59503	5.32298	5.46494	5.07148	5.56	5.16773	5.471	5.22867	5.329	5.38562	5.208	5.597	5.15572	5.0759
Ta	3.95013	3.337	3.41	2.21703	3.328	3.221	4.389	3.97711	3.98338	4.351	3.8803	3.33	1.44427	4.283	4.265	4.217	3.58346	3.80763	3.49567	3.56204	3.10925	3.916	3.06065	3.907	3.2428	3.918	2.88152	3.816	3.835	3.02271	2.97798
Pb	4.27501	3.333	3.122	2.7845	3.347	3.721	4.704	4.27266	4.25231	4.567	4.65635	4.166	21.5323	4.827	4.232	5.18	4.41265	4.47197	4.62235	4.58542	3.9742	4.023	4.60207	4.975	4.68783	5.235	6.64619	4.398	4.794	2.69558	4.71084
Th	5.33158	2.669	2.713	3.02049	2.644	2.914	4.372	5.37575	5.36059	4.492	5.40674	2.874	5.77212	4.209	4.18	4.264	4.61507	4.83481	5.20976	5.05873	4.44939	3.901	4.93325	3.79	4.56957	3.744	5.00971	3.935	4.091	4.8601	4.82959
U	1.56745	0.801	0.826	0.793055	0.832	0.823	1.485	1.56671	1.59647	1.654	1.60216	0.808	1.06343	1.543	1.398	2.473	1.34917	1.61579	1.51674	1.56698	1.27342	1.197	1.28857	1.171	1.34897	1.252	1.31988	1.159	1.358	1.36476	1.5489

## Sheet: Table S2
Table S2 Olivine compositions of the Wulanhada Volcanic Field.
Anaysis	SiO2 (wt%)	TiO2 (wt%)	Al2O3 (wt%)	FeO (wt%)	MnO(wt%)	MgO (wt%)	CaO (wt%)	Na2O (wt%)	K2O (wt%)	Cr2O3 (wt%)	P2O5 (wt%)	NiO(wt%)	Total
BLDL1-7-11ol-c	38.245	0.021	0.012	22.752	0.325	38.269	0.323	0.019	0				99.966
BLDL1-7-2-1-ol-c	38.258	0.026	0.037	22.734	0.313	38.455	0.334	0.103	0.04				100.301
BLDL1-7-3-1-ol-c	38.166	0.05	0.03	22.837	0.279	38.266	0.33	0.009	0.003				99.969
BLDL1-7-4-1-ol-c	38.429	0	0.041	23.43	0.33	37.913	0.323	0.049	0.002			0.066	100.583
BLDL1-7-4-1-ol-r	38.454	0	0.034	23.187	0.375	37.879	0.373	0.025	0.001			0.078	100.406
BLDL1-7-5-1-ol-c	37.636	0.01	0.01	22.602	0.343	38.442	0.34	0.087	0.025				99.495
BLDL1-7-5-1-ol-c	38.032	0.006	0.027	23.073	0.315	38.134	0.354	0.03	0.016			0.06	100.046
BLDL1-7-5-1-ol-c	38.19	0.036	0.025	22.961	0.351	37.859	0.381	0.438	0.045			0.062	100.348
BLDL1-7-6-1-ol-c	38.315	0.054	0.049	22.698	0.302	38.462	0.348	0.177	0.069				100.472
BLDL1-10-1-1-ol-c	38.434	0.128	0.043	23.096	0.318	38.081	0.335	0.027	0.001				100.462
BLDL1-10-1-1-ol-c	37.885	0.002	0.034	23.556	0.34	37.748	0.371	0.004	0.001			0.071	100.013
BLDL1-10-1-1-ol-r	38.406	0.024	0.057	23.062	0.37	37.857	0.35	0.005	0			0.076	100.207
BLDL1-10-1-2-ol-c	38.566	0.048	0.02	23.21	0.311	38.012	0.335	0	0				100.503
BLDL1-10-3-1-ol-c	38.749	0.064	0.026	23.105	0.356	38.182	0.333	0.004	0				100.819
BLDL1-10-4-1-ol-c	38.106	0.024	0.026	23.12	0.334	38.255	0.323	0.01	0.014				100.212
BLDL1-10-5-1-ol-c	38.446	0.037	0.012	22.528	0.333	38.132	0.343	0.16	0.016				100.008
BLDL1-10-8-1-ol-c	38.42	0.008	0.027	23.185	0.308	38.121	0.342	0	0				100.411
BLDL1-10-8-1-ol-c	38.189	0.022	0.078	23.821	0.313	37.86	0.363	0	0.001			0.066	100.712
BLDL1-10-8-1-ol-r	37.936	0.011	0.017	23.205	0.335	37.974	0.348	0.024	0			0.088	99.937
BLDL1-11-1-1-ol-c	38.578	0.01	0.033	22.429	0.331	38.356	0.33	0.119	0.009				100.195
BLDL1-11-2-1-ol-c	38.573	0.057	0.035	22.318	0.322	38.453	0.323	0.027	0.014				100.123
BLDL1-11-2-1-ol-c	37.12	0.01	0.029	21.778	0.341	36.693	0.351	2.039	0.282			0.094	98.738
BLDL1-11-2-1-ol-r	38.006	0.012	0.041	23.141	0.386	37.921	0.364	0.049	0.011			0.054	99.987
BLDL1-11-5-2-1-ol-c	38.151	0	0.008	22.812	0.309	37.369	0.339	0.024	0				99.013
BLDL1-11-3-1-ol-c	38.23	0.029	0.031	23.038	0.302	38.385	0.347	0.093	0.026				100.481
BLDL1-11-4-1-ol-c	38.204	0.034	0.034	22.559	0.301	38.88	0.329	0.001	0.001				100.343
BLDL1-11-4-1-ol-c	38.979	0.032	0.042	22.15	0.299	39.697	0.363	0.064	0.007	0.041	0.029	0.066	101.769
BLDL1-11-5-2-ol-c	38.127	0.007	0.038	22.587	0.278	36.727	0.334	0.047	0.003				98.149
BLDL1-11-5-2-ol-c	38.482	0.035	0.016	22.823	0.349	38.585	0.326	0.003	0				100.619
BLDL1-11-5-1-ol-r	38.041	0.006	0.026	22.947	0.285	37.87	0.387	0.147	0.005			0.049	99.764
BLDL1-11-5-1-ol-r	38.21	0.006	0.044	22.802	0.358	36.25	0.315	0.059	0.009				98.053
BLDL1-11-5-1-ol-r	37.824	0.018	0.045	22.74	0.32	37.635	0.372	0.167	0.032			0.044	99.195
BLDL1-11-6-1-ol-c	39.208	0.052	0.077	22.334	0.403	39.25	0.326	0.056	0.019	0.041	0.054	0.153	101.973
ZLDL1-3-1-2-ol-c	39.193	0.024	0.027	20.938	0.309	39.334	0.377	0.295	0.09				100.588
ZLDL1-3-1-2-ol-c	37.443	0.025	0.038	21.252	0.385	37.721	0.473	0.909	0.083			0.094	98.424
ZLDL1-3-1-2-ol-c	38.592	0.017	0.033	21.163	0.275	38.314	0.375	0.125	0.021			0.115	99.031
ZLDL1-3-6-2-ol-c	38.727	0.05	0.401	21.463	0.282	37.978	0.391	0.054	0.034	0	0.04	0.08	99.38
ZLDL1-3-6-2-ol-c	38.665	0	0.025	22.246	0.309	38.032	0.341	0.031	0			0.087	99.737
ZLDL1-3-6-2-ol-r	38.176	0.015	0.015	21.308	0.357	38.367	0.346	0.014	0.006			0.127	98.731
ZLDL1-6-1-3-ol-c	38.406	0.046	0.033	21.593	0.33	39.255	0.365	0	0.004	0.036	0	0.036	100.031
ZLDL1-6-2-1-ol-c	38.49	0.036	0.017	20.871	0.32	39.531	0.351	0.013	0				99.63
ZLDL1-6-3-1-ol-c	38.946	0.03	0.016	21.081	0.282	39.839	0.347	0.018	0	0	0	0.108	100.56
ZLDL1-6-4-1-ol-c	38.617	0.016	0.021	20.756	0.297	39.559	0.33	0.006	0	0	0.005	0.146	99.603
ZLDL1-6-5-1-ol-c	39.045	0.033	0.012	21.29	0.278	39.704	0.347	0.004	0	0	0.068	0.125	100.713
ZLDL1-6-6-1-ol-c	39.275	0.033	0.044	23.817	0.345	37.38	0.305	0.022	0.002	0	0.112	0.124	101.223
ZLDL1-6-7-1-ol-r	39.265	0.024	0.056	21.7	0.301	39.111	0.447	0.008	0	0.057	0.053	0.122	100.913
ZLDL3-1-3-1-ol-c	37.894	0.029	0.045	26.265	0.345	35.507	0.321	0.03	0.006	0	0.053	0.036	100.441
ZLDL3-1-6-1-ol-c	38.087	0.03	0.019	28.112	0.476	33.402	0.309	0.038	0.003	0	0.03	0.064	100.477
ZLDL3-1-9-1-ol-c	37.963	0.048	0.036	27.019	0.361	34.907	0.307	0.004	0.01	0.063	0.057	0.073	100.654
ZLDL3-1-13-1-ol-c	37.327	0.056	0.056	24.145	0.342	37.309	0.316	0	0	0.043	0.061	0.03	99.552
ZLDL3-1-14-1-ol-c	38.225	0.019	0.036	24.071	0.331	37.093	0.306	0.009	0.003	0.035	0.053	0.042	100.093
ZLDL3-1-15-1-ol-c	37.848	0.043	0.04	26.547	0.401	35.216	0.31	0.014	0	0	0.049	0	100.419
ZLDL3-2-4-1-ol-c	38.663	0.012	0.051	24.113	0.347	37.32	0.296	0.017	0	0.035	0.038	0.125	100.82
ZLDL3-2-4-1-ol-c	37.936	0.014	0.042	24.533	0.308	36.786	0.301	0.008	0.004			0.069	100.01
ZLDL3-2-4-1-ol-c	37.668	0.006	0.054	24.455	0.315	35.053	0.324	0.033	0.003			0.099	98.01
ZLDL3-2-4-1-ol-r	37.936	0.014	0.042	24.533	0.308	36.786	0.301	0.008	0.004			0.069	100.01
ZLDL3-2-9-2-ol-c	37.85	0.021	0.02	23.577	0.272	36.855	0.301	0	0.009	0	0.084	0.099	98.904
ZLDL3-2-9-2-ol-c	37.49	0.019	0.028	25.582	0.429	35.535	0.342	0.015	0.022			0.023	99.484
ZLDL3-2-9-2-ol-c	38.005	0.038	0.042	24.361	0.343	36.59	0.319	0.02	0.003			0.049	99.771
ZLDL3-2-9-2-ol-r	37.49	0.019	0.028	25.582	0.429	35.535	0.342	0.015	0.022			0.023	99.484
ZLDL3-2-5-6-ol-c	38.095		0.028	27.616	0.302	35.146	0.309	0.049	0.004		0.077	0.065	101.691
ZLDL3-2-12OL-C1	36.877	0.048	0.035	27.477	0.443	33.919	0.29	0.032	0.011	0.016	0.084	0.085	99.317
ZLDL3-2-12OL-C2	37.4	0.029	0.039	27.563	0.458	33.872	0.281	0.017	0.003		0.049		99.711
ZLDL3-2-12OL-C3	37.494	0.111	0.004	26.816	0.384	34.473	0.334	0.039	0.003		0.022	0.06	99.74
ZLDL3-2-12OL-R1	37.795	0.01	0.026	25.188	0.522	35.781	0.345	0.014		0.029	0.055	0.107	99.872
ZLDL3-2-12OL-R2	37.714	0.049	0.051	25.374	0.373	36.314	0.374		0.008		0.094		100.351
ZLDL3-2-12OL-R3	37.515	0.038	0.035	24.284	0.378	36.392	0.342	0.005	0.022	0.004	0.096		99.111
ZLDL3-3-4-1-ol-c	37.949	0	0.024	25.444	0.317	36.466	0.306	0	0.005				100.511
ZLDL3-3-4-1-ol-c	37.49	0.024	0.014	25.302	0.403	35.936	0.308	0	0.003			0.057	99.536
ZLDL3-3-4-1-ol-c	37.69	0	0.027	25.819	0.317	35.999	0.324	0.011	0.005			0.07	100.263
ZLDL3-3-4-1-ol-r	37.49	0.024	0.014	25.302	0.403	35.936	0.308	0	0.003			0.057	99.536
ZLDL3-3-5-5-ol-c	37.94	0.016	0.02	28.056	0.429	34.079	0.303	0.013	0	0	0.112	0.048	100.857
ZLDL3-3-7-1-ol-c	37.641	0.054	0.03	23.962	0.309	36.782	0.308	0.029	0				99.116
ZLDL3-3-7-1-ol-c	38.107	0	0.038	24.673	0.368	36.801	0.303	0.015	0.001			0.08	100.386
ZLDL3-3-7-1-ol-c	37.974	0	0.021	24.588	0.312	36.921	0.306	0.022	0			0.04	100.183
ZLDL3-3-7-2-ol-c	38.45	0.012	0.037	25.282	0.348	36.355	0.313	0.034	0.011	0.03	0.057	0.041	100.842
ZLDL3-3-8-3-ol-c	38.962	0.026	0.024	24.242	0.347	36.597	0.319	0.006	0.006				100.529
NLDL1-1-2-2-ol-c	37.569	0.036	0.05	23.898	0.267	37.062	0.264	0.055	0.012	0.014	0.045	0.158	99.212
NLDL1-1-3-2-ol-c	37.361	0.011	0.036	25.839	0.322	35.777	0.298	0.01	0.007	0.007	0.007	0.078	99.662
NLDL1-1-4-2-ol-c	37.609	0.014	0.043	24.695	0.309	36.495	0.316	0.322	0.124	0.05	0.04	0.102	99.928
NLDL1-1-5-1-ol-c	37.281	0.026	0.026	25.659	0.35	35.406	0.286	0.064	0.024	0	0.034	0.035	99.121
NLDL1-1-9-2-ol-c	37.538	0	0.048	24.855	0.338	36.091	0.3	0.235	0.137	0.078	0.072	0.023	99.543
NLDL1-1-9-2-ol-r	38.157	0.049	0.05	24.332	0.364	36.492	0.372	0.124	0.041	0.029	0.06	0.078	100.148
NLDL1-1-11-1-ol-c	38.588	0.021	0.021	21.371	0.265	39.218	0.27	0.01	0.014	0	0.025	0.001	99.779
NLDL1-1-12-1-ol-c	37.613	0	0.037	24.547	0.329	36.317	0.276	0.005	0	0.106	0.015	0	99.124
NLDL1-1-13-2-ol-c	38.186	0.029	0.024	24.41	0.32	36.915	0.301	0.001	0.008	0.078	0.036	0.092	100.194
NLDL1-1-13-3-ol-c	38.58	0.01	0.016	23.483	0.284	38.043	0.312	0.019	0	0	0.016	0.102	100.746
NLDL1-2-1-1-ol-c	38.211	0.039	0.042	20.891	0.232	41.083	0.267	0.101	0.025	0	0.006	0.126	100.89
NLDL1-2-1-1-ol-c	37.639	0	0.023	21.688	0.191	38.394	0.279	0.206	0.021			0.069	98.51
NLDL1-2-1-1-ol-c	38.174	0.003	0.035	19.77	0.251	40.107	0.245	0.07	0.021			0.182	98.857
NLDL1-2-1-1-ol-r	39.081	0.035	0.041	21.201	0.313	40.01	0.314	0.044	0.027	0.018	0.06	0.057	101.201
NLDL1-2-1-1-ol-r	37.639	0	0.023	21.688	0.191	38.394	0.279	0.206	0.021			0.069	98.51
NLDL1-2-2-1-ol-c	38.481	0.042	0.057	22.286	0.291	40.039	0.257	0.023	0.007	0	0.007	0.116	101.482
NLDL1-2-2-2-ol-c	37.447	0.019	0.041	25.693	0.361	36.91	0.258	0.03	0.011	0	0	0.101	100.77
NLDL1-2-4-1-ol-c	37.192	0.008	0.046	25.143	0.299	37.397	0.242	0.009	0.001	0.134	0.083	0.166	100.337
NLDL1-2-4-2-ol-c	37.04	0.041	0.001	26.561	0.375	36.297	0.275	0	0.008	0.007	0.049	0.091	100.597
NLDL1-2-4-2-ol-r	38.675	0.056	0.001	22.232	0.349	39.288	0.378		0.02	0.018	0.045	0.14	101.202
NLDL1-2-7-1-ol-c	39.015	0.01	0.025	19.996	0.255	42.098	0.24	0.022	0	0	0.029	0.061	101.663
NLDL1-2-7-1-ol-c	38.62	0.018	0.015	21.763	0.324	38.752	0.262	0.013	0			0.094	99.86
NLDL1-2-7-1-ol-c	38.804	0	0.054	19.438	0.222	40.626	0.247	0.004	0			0.232	99.628
NLDL1-2-7-1-ol-r	38.62	0.018	0.015	21.763	0.324	38.752	0.262	0.013	0			0.094	99.86
NLDL2-1-1-1-ol-c	37.496	0	0.029	21.102	0.276	40.197	0.256	0.168	0.077	0.079	0	0.185	99.601
NLDL2-1-1-2-ol-c	37.452	0.037	0.022	21.303	0.236	40.834	0.259	0.059	0.004	0.064	0.048	0.081	100.206
NLDL2-1-1-2-ol-r	38.768	0.017	0.022	21.062	0.365	40.277	0.344	0.058	0.02	0.065		0.063	101.061
NLDL2-1-1-3-ol-c	37.276	0.042	0.032	20.616	0.248	40.628	0.284	0.202	0.044	0	0.007	0.214	99.371
NLDL2-1-1-3-ol-r	38.884	0.076	0.354	19.525	0.297	40.42	0.418	0.261	0.11	0.22	0.088	0.203	100.856
NLDL2-1-2-2-ol-c	37.795	0	0.03	20.243	0.281	42.303	0.253	0	0	0.114	0.032	0.228	100.904
NLDL2-1-2-3-ol-c	37.658	0.021	0.032	21.064	0.263	41.331	0.268	0	0	0	0	0.175	100.636
NLDL2-1-2-3-ol-r	38.571	0.048	0.01	22.703	0.233	39.764	0.294	0.043	0.018	0.041	0.037	0.18	101.942
NLDL2-1-4-3-ol-c	37.871	0.013	0.051	21.645	0.24	40.92	0.214	0	0.005	0.093	0.066	0.176	100.959
NLDL2-1-4-3-ol-c	38.779	0.002	0.035	21.352	0.242	39.034	0.209	0	0			0.163	99.817
NLDL2-1-4-3-ol-r	38.179	0.009	0.025	21.847	0.266	38.487	0.294	0.011	0			0.143	99.261
NLDL2-1-4-3-ol-r	39.012	0.112	0.056	20.296	0.302	40.197	0.312	0.037	0.004	0.089	0.048	0.092	100.557
NLDL2-1-6-1-ol-c	37.014	0.039	0.038	21.448	0.284	40.538	0.286	0.097	0.008	0	0.016	0.05	99.753
NLDL2-1-6-1-ol-r	39.199	0.035	0.042	21.715	0.291	40.153	0.371	0.006	0.02	0.018	0.03	0.078	101.958
NLDL2-1-6-2-ol-c	37.551	0.013	0.037	24.18	0.317	39.016	0.273	0.123	0.014	0.05	0.043	0.129	101.523
NLDL2-1-8-1-ol-c	37.47	0.043	0.027	22.411	0.328	40.241	0.268	0.027	0.019	0	0.082	0.016	100.834
NLDL2-1-10-1-ol-c	38.238	0.007	0.028	21.273	0.24	41.284	0.245	0.021	0.008	0.27	0.041	0.035	101.344
NLDL2-1-10-2-ol-c	38.372	0	0.033	21.049	0.251	41.312	0.241	0.002	0	0	0.01	0.144	101.26
NLDL2-1-10-3-ol-c	38.478	0	0.039	19.552	0.21	42.678	0.241	0.005	0.001	0	0	0.11	101.204
NLDL2-1-12-1-ol-c	37.96	0.032	0.025	20.783	0.256	41.988	0.257	0	0	0.007	0.016	0.101	101.301
NLDL2-1-12-2-ol-c	38.222	0.016	0.027	20.735	0.24	41.765	0.262	0	0	0.029	0.023	0.124	101.268
NLDL2-1-12-2-ol-r	39.153	0.017	0.023	21.18	0.305	40.563	0.288	0.027	0.006	0.095		0.065	101.722
NLDL2-6-1-1-ol-c	37.805	0.031	0.043	21.939	0.223	39.029	0.26	0.022	0.016		0.01	0.022	99.4
NLDL2-6-1-1-ol-r	37.366	0.041	0.065	24.548	0.309	37.546	0.29		0.009	0.042	0.022	0.097	100.335
NLDL2-6-1-3-ol-c	38.417	0.03	0.022	25.215	0.363	35.797	0.277	0	0.004				100.124
NLDL2-6-3-1-ol-c	38.461	0.026	0.039	24.359	0.295	37.063	0.282	0	0				100.524
NLDL2-6-5-5-ol-c	38.859	0.046	0.026	24.727	0.368	36.508	0.269	0.08	0.024				100.907
NLDL2-6-5-5-ol-c	37.655	0.025	0.045	23.211	0.355	37.806	0.31	0.061	0.023	0.083	0.006	0.105	99.685
NLDL2-6-5-5-ol-r	37.787	0.047	0.029	23.807	0.36	36.651	0.327	0.027			0.048	0.075	99.158
NLDL2-6-6-1-ol-c	38.603	0.028	0.044	24.965	0.375	35.946	0.281	0.004	0.001				100.246
NLDL2-6-6-1-ol-r	37.607	0.063	0.034	24.318	0.265	37.271	0.31	0.048	0.007		0.019	0.08	100.022
NLDL2-6-7-1-ol-c	38.908	0.022	0.047	24.055	0.276	37.17	0.257	0.011	0				100.745
NLDL2-6-7-1-ol-r	37.666	0.094	0.051	24.081	0.353	36.862	0.311				0.015	0.093	99.526
NLDL2-6-7-4-ol-c	38.724	0.008	0.055	25.058	0.323	36.509	0.257	0.005	0.009				100.947
NLDL2-6-8-2-ol-c	38.473	0.008	0.043	27.713	0.326	34.514	0.285	0.084	0.007				101.453
NLDL2-6-6-1-ol-c	37.744	0.027	0.078	23.844	0.389	37.961	0.26	0.056	0.008		0.023	0.055	100.445
NLDL2-6-7-1-ol-c	37.616	0.026	0.036	23.64	0.314	37.573	0.282		0.008		0.021	0.105	99.621
NLDL2-9-2-2-ol-c	39.345	0.021	0.041	20.541	0.211	39.882	0.241	0.011	0				100.293
NLDL2-9-2-2-ol-c	38.383	0.007	0.051	19.137	0.328	40.672	0.244	0.012		0.024	0.032	0.156	99.046
NLDL2-9-2-2-ol-r	37.748		0.002	23.243	0.264	38.265	0.289	0.033	0.006	0.024	0.006	0.058	99.938
NLDL2-9-4-3-ol-c	38.219	0.039	0.036	24.781	0.252	36.606	0.266	0.032	0.006				100.237
NLDL2-9-4-3-Glo-ol-c	38.019	0.004	0.05	23.958	0.314	38.607	0.27	0.015	0.026	0.018	0.056	0.12	101.457
NLDL2-9-4-3-Glo-ol-r	37.635	0.043	0.043	23.453	0.267	38.765	0.327	0.034	0.008		0.055	0.118	100.748
NLDL2-9-4-4-ol-c	38.456	0.031	0.039	24.39	0.321	36.783	0.272	0.023	0.008				100.322
NLDL2-9-4-5-ol-c	38.952	0.014	0.032	24.577	0.249	36.553	0.274	0.049	0.005				100.705
NLDL2-9-5-1-ol-c	38.346	0.027	0.039	24.769	0.295	36.943	0.274	0.015	0.005				100.713
NLDL2-9-6-3-ol-c	39.212	0.018	0.021	23.436	0.353	37.157	0.289	0.046	0.014				100.545
NLDL2-9-7-2-ol-c	37.057	0.021	0.018	24.644	0.32	39.125	0.29	0.01	0				101.485
NLDL2-9-8-6-ol-c	38.522	0.01	0.033	24.753	0.356	36.735	0.293	0.012	0.011				100.724
NLDL2-9-8-6-ol-c	37.727	0.047	0.028	22.998	0.242	37.898	0.273	0.084		0.054	0.036	0.062	99.449
NLDL2-9-9-2-ol-c	38.865	0.03	0.051	24.448	0.308	36.45	0.257	0.05	0.016				100.475
NLDL2-9-11-ol-r	37.935	0.064	0.043	24.021	0.327	38.315	0.309	0.061	0.012	0.03	0.053	0.151	101.321
HSS01-1-1-ol-c	38.871	0.042	0.038	23.413	0.418	38.395	0.324	0.053	0.011	0.041	0.025	0.041	101.672
HSS01-4-3-ol-c	38.425	0.046	0.025	24.175	0.328	36.008	0.292	0.002	0.006				99.307
HSS01-4-3-ol-c	37.585	0.028	0.054	24.398	0.342	36.351	0.309	0	0.006			0.046	99.119
HSS01-4-3-ol-c	38.926	0.099	0.02	23.548	0.373	38.33	0.299	0.002			0.067		101.664
HSS01-4-3-ol-r	37.333	0	0.027	23.933	0.293	36.06	0.324	0.013	0.007			0.034	98.025
HSS02-5-1-ol-c	38.093	0	0.045	22.413	0.388	37.939	0.302	0.35	0.197				99.727
HSS02-5-1-ol-c	38.863	0.022	0.032	20.853	0.381	40.084	0.29	0.103	0.041	0.012	0.035	0.022	100.738
HSS02-5-1-ol-r	38.455	0.071	0.006	21.467	0.333	39.136	0.288	0.113	0.016	0.024	0.02	0.089	100.018
HSS04-6-1-ol-c	37.644	0.016	0.022	23.91	0.315	36.868	0.289	0.051	0				99.116
HSS04-6-1-ol-r	38.714	0.057	0.059	24.263	0.449	37.189	0.306	0.034	0.022	0.224	0.053	0.038	101.408
HSS05-4-1-ol-c	38.036	0.002	0.02	27.22	0.404	34.82	0.299	0.008	0.003			0.02	100.832
HSS05-4-1-ol-r	38.419	0.022	0.023	27.468	0.388	34.269	0.261	0	0				100.851
HSS05-4-1-ol-r	36.543	0	0.054	28.235	0.417	33.903	0.265	0.004	0			0.018	99.44
HSS05-6-2-ol-c	38.761	0.03	0.051	24.48	0.306	37.147	0.304	0	0.004				101.082
HSS05-6-2-ol-c	38.143	0.022	0.028	24.75	0.345	36.589	0.302	0	0			0.024	100.203
HSS05-6-2-ol-c	38.173	0	0.032	24.881	0.343	36.785	0.319	0	0			0.062	100.594
HSS05-6-3-ol-c	39.008	0.039	0.026	25.066	0.252	37.215	0.291	0	0				101.897
HSS06-8-1-ol-c	39.199	0.012	0.022	23.551	0.301	37.848	0.301	0.031	0				101.265
HSS06-8-1-ol-r	38.458	0.035	0.03	23.776	0.315	38.779	0.313	0.045	0.016	0.006	0.026	0.051	101.85
HSS06-3-1-ol-r	38.876	0.025	0.022	24.839	0.338	37.319	0.295	0	0.004				101.717
HSS07-3-2-ol-c	37.82	0.029	0.035	24.218	0.333	35.174	0.295	0.344	0.13				98.377
HSS07-9-1-ol-c	38.677	0.033	0.03	24.668	0.341	36.047	0.292	0.006	0				100.093
HSS07-11-1-ol-r	38.169	0.036	0.026	24.417	0.365	36.933	0.292	0.009	0.002				100.249
HSS07-12-1-ol-c	38.596	0.034	0.033	22.996	0.284	37.067	0.281	0.064	0.015				99.37
HSS07-14-2-ol-c	37.527	0.026	0.052	24.392	0.351	37.948	0.309	0.209	0.052				100.866
HSS08-3-1-ol-c	37.365	0.056	0.023	24.585	0.326	37.937	0.291	0.027	0.016				100.626
HNB1-1-5-4-ol-c	38.301	0.028	0.047	26.285	0.403	35.55	0.296	0	0				100.908
HNB1-1-5-4-ol-c	37.192	0.007	0.05	26.517	0.389	34.312	0.412	0.018	0.022			0.065	98.983
HNB1-1-5-4-ol-c	37.521	0.032	0.038	24.947	0.298	37.279	0.287	0.007	0.005	0.095	0.056	0.124	100.689
HNB1-1-5-4-ol-r	37.505	0.038	0.036	23.761	0.225	37.864	0.332	0.046	0.024	0.721	0.019	0.06	100.631
HNB1-1-6-1-ol-c	38.186	0.028	0.038	24.358	0.348	36.567	0.292	0.053	0.01				99.881
HNB1-2-1-3-ol-c	38.43	0.028	0.035	24.297	0.325	36.834	0.291	0.004	0.005				100.25
HNB1-2-4-2-ol-c	38.074	0.041	0.022	25.34	0.342	36.09	0.285	0	0.005				100.199
HNB1-2-4-2-ol-c	37.903	0.019	0.03	25.785	0.289	36.163	0.305	0	0			0.073	100.569
HNB1-2-4-2-ol-r	37.192	0.007	0.05	26.517	0.389	34.312	0.412	0.018	0.022			0.065	98.983
HNB1-2-5-4-ol-c	38.834	0.01	0.037	24.407	0.362	37.087	0.299	0.009	0.005				101.049
HNB1-2-5-4-ol-c	37.43	0.015	0.027	24.566	0.336	36.453	0.338	0.01	0.001			0.05	99.227
HNB1-2-5-4-ol-c	37.951	0	0.03	24.644	0.296	36.784	0.282	0.004	0			0.047	100.038
HNB1-2-5-4-ol-r	37.43	0.015	0.027	24.566	0.336	36.453	0.338	0.01	0.001			0.05	99.227
HNB1-2-5-5-ol-c	37.97	0.034	0.056	24.242	0.373	36.656	0.286	0	0.015				99.631
HNB1-2-10-ol-c	37.663	0.022	0.044	24.086	0.311	38.016	0.3	0.006		0.071	0.014	0.081	100.614
HNB1-5-1-2-ol-c	38.553	0.018	0.036	23.666	0.292	37.194	0.261	0.012	0.002				100.034
HNB1-5-3-1-ol-c	38.61	0.035	0	24.289	0.322	36.737	0.281	0.043	0.009				100.327
HNB1-5-5-7-ol-c	37.869	0	0.043	24.183	0.312	36.252	0.29	0.008	0				98.957
HNB1-5-6-1-ol-c	37.796	0.021	0.034	24.17	0.285	36.264	0.307	0.045	0.012				98.934
HNB1-5-10-2-ol-c	38.651	0.033	0.037	24.364	0.33	36.333	0.289	0.006	0.002				100.045
HNB1-5-11-1-ol-c	38.694	0.027	0.016	23.838	0.3	36.202	0.279	0.002	0				99.357
HNB-ZM-1-2-ol-c	38.938	0.032	0.015	24.342	0.353	37.628	0.292	0.011	0.016				101.627
HNB-ZM-1-2-ol-c	38.618	0.006	0.039	23.653	0.269	38.732	0.312	0.028			0.046	0.082	101.785
HNB-ZM-1-2-ol-r	38.304	0.062	0.083	25.365	0.345	36.615	0.415	0.028	0.017	0.006	0.113	0.034	101.387
HNB-ZM-5-1-ol-c	38.628	0.036	0.046	23.796	0.309	37.428	0.281	0.03	0.002				100.557
HNB-ZM-5-1-ol-c	37.952	0.019	0.042	22.841	0.288	37.841	0.3	0.174	0.031			0.102	99.588
HNB-ZM-5-1-ol-r	37.82	0.025	0.032	24.011	0.309	36.244	0.319	0.073	0.013			0.086	98.931
HNB-ZM-5-1-ol-r	38.966	0.018	0.031	23.989	0.277	38.125	0.315	0.025	0.011		0.051	0.053	101.861
HNB-ZM-6-2-ol-c	38.207	0.033	0.029	23.963	0.36	36.351	0.285	0.196	0.013				99.438
HS01-1-1-1-ol-c	39.056	0.026	0.025	23.137	0.247	38.162	0.303	0.023	0.003				100.98
HS01-1-1-2-ol-c	39.134	0.024	0.042	24.157	0.351	37.094	0.3	0.002	0				101.104
HS01-1-2-2-ol-c	38.658	0.03	0.058	24.502	0.309	37.069	0.292	0.01	0.005				100.933
HS01-1-3-2-ol-c	39.198	0.02	0.004	24.517	0.352	36.712	0.291	0.017	0				101.11
HS01-1-3-2-ol-c	38.101	0	0.024	24.725	0.335	36.335	0.337	0.014	0			0.067	99.937
HS01-1-3-2-ol-r	37.906	0.026	0.049	24.887	0.377	36.085	0.34	0.007	0.016			0.056	99.749
HS01-1-3-1-ol-r	37.974	0.015	0.007	24.894	0.357	38.252	0.3	0.045		0.053	0.035	0.056	101.988
HS01-1-3-1-ol-r	37.511	0.053	0.005	25.535	0.441	37.452	0.341		0.023		0.035		101.396
HS01-1-3-3-ol-c	39.2	0.039	0.029	24.489	0.354	36.698	0.305	0.014	0				101.128
HS01-1-4-1-ol-c	38.668	0.047	0.035	24.037	0.345	37.178	0.32	0.002	0.001				100.634
HS01-1-4-2-ol-c	39.34	0.021	0.028	24.783	0.333	36.934	0.304	0	0.001				101.744
HS01-1-4-2-ol-c	38.07	0.002	0.037	24.384	0.313	38.065	0.322	0.018			0.055	0.068	101.334
HS01-1-4-2-ol-r	38.033	0.053	0.033	22.724	0.431	37.09	0.358	0.007		0.042	0.042	0.056	98.869
HS01-1-5-1-ol-c	38.758	0.042	0.022	24.401	0.352	37.114	0.303	0.052	0				101.044
HS01-1-5-1-ol-c	37.897	0.042	0.057	23.442	0.285	38.636	0.295	0.04	0.01	0.018	0.059	0.134	100.915
HS01-1-6-1-ol-c	38.582	0.02	0.033	24.571	0.388	36.821	0.324	0	0.003				100.741
HS01-1-6-1-ol-c	38.343	0.005	0.038	24.3	0.321	36.463	0.343	0.036	0.002			0.014	99.868
HS01-1-6-1-ol-c	37.89	0.007	0.038	24.576	0.354	36.526	0.336	0	0			0.077	99.804
HS01-1-6-1-ol-r	38.343	0.005	0.038	24.3	0.321	36.463	0.343	0.036	0.002			0.014	99.868
HS03-6-1-ol-r	37.607	0.038	0.04	24.386	0.345	36.176	0.386	0.041	0.034			0.046	99.099
HS01-1-7-2-ol-c	38.302	0.027	0.033	24.365	0.326	36.929	0.309	0.008	0.003				100.302
HS03-1-1-ol-c	38.642	0.031	0.037	24.062	0.347	36.621	0.299	0.061	0.011				100.112
HS03-6-1-ol-c	38.512	0.024	0.052	24.447	0.333	36.619	0.319	0	0.001				100.308
HS03-6-1-ol-c	37.607	0.038	0.04	24.386	0.345	36.176	0.386	0.041	0.034			0.046	99.099
HS03-6-1-ol-c	38.18	0.023	0.054	24.263	0.397	36.636	0.337	0	0			0.055	99.947
HS03-8-1-ol-c	38.639	0.031	0.044	24.156	0.359	36.836	0.325	0.02	0.001				100.412
HS03-8-1-ol-c	38.033	0.022	0.026	26.666	0.355	34.334	0.41	0	0.003			0.051	99.899
HS03-8-1-ol-c	37.952	0	0.046	24.196	0.341	36.674	0.306	0.025	0			0.022	99.561
HS03-8-1-ol-c	37.876	0.033	0.052	24.199	0.283	38.327	0.312		0.018		0.059	0.097	101.256
HS03-8-1-ol-r	38.033	0.022	0.026	26.666	0.355	34.334	0.41	0	0.003			0.051	99.899
HS03-8-1-ol-r	37.705	0.07	0.016	23.586	0.272	37.482	0.321		0.005	0.078	0.037	0.043	99.615

## Sheet: Table S3
Table S3 Clinopyroxene compositions of the Wulanhada Volcanic Field.
Anaysis	SiO2 (wt%)	TiO2 (wt%)	Al2O3 (wt%)	FeO (wt%)	MnO(wt%)	MgO (wt%)	CaO (wt%)	Na2O (wt%)	K2O (wt%)	Cr2O3 (wt%)	P2O5 (wt%)	NiO(wt%)	Total
BLDL1-10-2-1-cpx-c	44.021	3.454	8.513	8.157	0.107	11.397	21.899	0.76	0.009				98.316
BLDL1-10-2-2-cpx-c	44.633	3.457	8.046	8.134	0.093	11.833	22.163	0.69	0.009				99.058
BLDL1-10-2-1-cpx-c	50.708	1.452	4.457	7.102	0.116	14.415	22.166	0.588	0.023	0.089	0.036	0.069	101.221
BLDL1-10-2-1-cpx-r	45.395	3.742	8.292	8.912	0.092	11.172	22.301	0.777	0.042	0	0.149	0	100.874
BLDL1-10-4-2-cpx-c	48.165	1.873	5.18	7.375	0.12	13.518	22.401	0.58	0.005				99.218
BLDL1-10-6-1-cpx-c	49.841	1.526	3.909	7.075	0.112	14.379	22.027	0.557	0.011				99.437
BLDL1-10-6-1-cpx-c	50.239	0.393	3.946	6.916	0.11	14.342	21.773	0.529	0.013				98.261
BLDL1-10-6-1-cpx-c	49.367	1.562	4.198	6.904	0.098	14.564	20.512	0.555	0.002	0.469	0.036		98.267
BLDL1-10-6-1-cpx-r	47.374	2.518	6.948	7.526	0.111	12.37	22.632	0.666	0.023	0.572	0.027		100.766
BLDL1-10-6-2-cpx-r	46.385	2.544	7.076	7.456	0.128	12.543	22.344	0.706	0.031				99.212
BLDL1-10-6CPX-C	50.282	1.557	4.242	6.519	0.17	14.58	22.234	0.544		0.32	0.05	0.031	100.529
BLDL1-10-6CPX-M1	47.895	2.265	6.465	7.444	0.106	13.271	22.529	0.656		0.26	0.017	0.039	100.947
BLDL1-10-6CPX-M2	47.474	2.395	6.779	7.474	0.143	12.757	22.297	0.634	0.008	0.193	0.032	0.01	100.196
BLDL1-10-6CPX-R	46.286	3.229	7.455	8.356	0.091	11.997	22.128	0.609	0.02	0.058	0.064	0.021	100.314
BLDL1-10-7-1-cpx-r	46.155	2.593	6.913	7.634	0.088	12.716	22.277	0.612	0.004				98.99
BLDL1-10-7-1-cpx-c	50.46	0.428	4.336	7.187	0.101	14.066	22.181	0.532	0.002				99.294
BLDL1-10-7-1-cpx-r	49.695	0.474	4.264	7.296	0.157	13.93	21.901	0.543	0.012				98.273
BLDL1-10-7-1-cpx-c	49.451	1.575	4.218	7.098	0.139	14.489	20.285	0.604	0.011	0.436	0		98.306
BLDL1-10-7-1-cpx-r	47.898	2.445	5.08	8.26	0.148	13.288	20.686	0.488	0.027	0.119	0.029		98.468
BLDL1-10-7-2-cpx-c	49.232	1.779	4.184	7.072	0.142	14.294	22.194	0.511	0				99.408
BLDL1-10-7-2CPX-C	49.857	1.621	4.358	6.634	0.121	14.181	22.232	0.53	0.008	0.158			99.7
BLDL1-10-7-2CPX-R	46.545	2.92	7.689	7.859	0.063	12.582	22.213	0.678	0.004	0.117	0.018		100.688
BLDL1-10-7-3-cpx-c	49.208	1.635	4.1	7.124	0.116	14.262	21.943	0.562	0				98.95
BLDL1-10-7-3CPX-C	49.432	1.561	4.48	6.617	0.123	14.38	22.31	0.53		0.072	0.009	0.018	99.532
BLDL1-10-7-3CPX-C2	49.89	1.569	4.467	6.927	0.129	14.061	22.191	0.543		0.112	0.016	0.041	99.946
BLDL1-10-7-3CPX-M	46.661	2.343	7.144	7.598	0.122	12.562	22.309	0.632	0.021	0.148	0.015	0.035	99.59
BLDL1-10-7-3CPX-R	46.005	3.223	7.41	8.163	0.225	11.957	22.138	0.647	0.055	0.009	0.067	0.012	99.911
BLDL1-10-7-4-cpx-c	45.962	2.758	7.032	7.746	0.112	12.468	22.196	0.693	0				98.966
BLDL1-10-9CPX-1	49.661	1.776	4.607	6.894	0.07	14.252	22.259	0.587		0.126	0.068		100.3
BLDL1-10-9CPX-2	49.554	1.578	4.473	7.122	0.085	14.068	22.434	0.542	0.013	0.135	0.023	0.022	100.049
BLDL1-10-9CPX-3	49.591	1.625	4.486	6.948	0.093	14.081	22.313	0.597	0.002	0.05	0.044		99.83
BLDL1-10-9CPX-4	49.492	1.574	4.495	6.9	0.099	14.1	22.359	0.599		0.113	0.004	0.003	99.738
BLDL1-10-9CPX-5	49.907	1.724	4.384	6.455	0.04	14.036	22.54	0.545		0.059	0.02		99.71
BLDL1-10-9CPX-6	47.259	2.175	6.65	7.523	0.069	12.834	22.213	0.682	0.011	0.963	0.05	0.019	100.448
BLDL1-10-9CPX-7	47.233	2.38	6.707	7.567	0.116	12.792	22.344	0.619		0.131	0.028		99.917
BLDL1-10-9CPX-8	46.734	3.097	6.964	8.3	0.13	12.069	22.465	0.652			0.068		100.479
BLDL1-10-9CPX-9	46.496	3.206	6.994	8.373	0.149	11.96	22.352	0.547	0.025	0.117	0.067		100.286
BLDL1-10-10-cpx-c	51.573	1.363	4.143	6.952	0.118	14.734	22.011	0.557	0.015	0.14	0.06	0.01	101.676
BLDL1-10-10-cpx-r	47.399	2.562	7.573	8.056	0.146	12.546	22.103	0.605	0.012	0.101	0.026	0.097	101.226
BLDL1-8-gm-cpx	45.467	3.539	7.015	9.663	0.171	11.59	21.887	0.701	0.057	0.013	0.261		100.364
BLDL1-7-gm-cpx	46.97	2.736	6.041	9.546	0.096	12.423	21.582	0.523	0.024	0.025	0.209		100.175
ZLDL1-3-1-1-cpx-c	47.689	2.58	6.916	7.144	0.101	12.555	22.527	0.617	0.012				100.141
ZLDL1-3-1-3-cpx-c	49.589	1.821	5.074	6.428	0.116	13.892	22.468	0.657	0.041				100.087
ZLDL1-3-2-1-cpx-c	47.56	2.632	6.913	7.027	0.112	12.401	22.327	0.604	0.006	0.435	0.026	0.037	99.581
ZLDL1-3-2-1-cpx-r	48.403	2.037	6.467	7.383	0.087	13.24	21.992	0.57	0.026	0.503	0.037	0.005	100.75
ZLDL1-3-2-1-cpx-c	50.431	1.5	4.337	7.246	0.114	14.107	22.003	0.504			0.015	0.013	100.27
ZLDL1-3-2-1-cpx-r	47.773	2.472	7.045	7.507	0.098	13.051	22.449	0.568	0.002	0.145	0.04	0.049	101.199
ZLDL1-3-2-1-cpx-c	49.848	1.734	4.901	7.157	0.106	14.041	22.037	0.471	0.005	0.063	0.024	0.021	100.408
ZLDL1-3-2-2-cpxc	49.178	1.81	4.521	7.762	0.146	13.689	21.888	0.525	0.005	0	0.031	0.005	99.524
ZLDL1-3-2-2CPX-C	49.258	1.78	4.543	7.094	0.197	13.684	22.374	0.55	0.011	0.103	0.03	0.052	99.676
ZLDL1-3-2-2CPX-M	45.774	2.951	7.996	8.054	0.17	11.857	22.312	0.761	0.015	0.081	0.051	0.025	100.047
ZLDL1-3-2-2CPX-R	47.515	2.138	6.227	6.409	0.09	13.514	22.604	0.542	0.011	0.513	0.062	0.033	99.658
ZLDL1-3-2-3CPX-C	48.831	1.75	5.086	6.723	0.113	14.038	22.524	0.516	0.004	0.288			99.873
ZLDL1-3-2-3CPX-R	47.61	2.758	5.656	7.913	0.101	12.64	22.167	0.47	0.023	0.076	0.101	0.017	99.532
ZLDL1-3-2-3-cpx-c	47.424	2.626	6.935	7.129	0.085	12.379	22.247	0.613	0.012	0.061	0.04	0	99.451
ZLDL1-3-2-3-cpx-r	48.697	2.03	6.21	7.196	0.052	13.431	22.48	0.583	0.018	0.372	0.032	0.001	101.102
ZLDL1-3-2-4CPX-C	48.788	1.803	4.675	7.375	0.11	13.726	22.084	0.501	0.006	0.013	0.037	0.065	99.183
ZLDL1-3-2-4CPX-M1	45.854	2.741	7.457	7.712	0.199	12.176	22.376	0.586	0.008		0.015	0.03	99.154
ZLDL1-3-2-4CPX-M2	47.36	1.911	6.07	6.617	0.12	13.193	22.442	0.587	0.008	0.549	0.039		98.896
ZLDL1-3-2-4CPX-R	46.625	3.063	6.624	8.044	0.171	12.114	22.307	0.539	0.035	0.013	0.087	0.048	99.67
ZLDL1-3-3-1-cpx-c	47.03	2.583	7.025	7.224	0.128	12.25	22.131	0.627	0.014	1.037	0.014	0.022	99.012
ZLDL1-3-4-1-cpx-c	47.891	2.579	6.945	7.261	0.147	12.488	22.509	0.618	0.008	0	0.057	0.071	100.444
ZLDL1-3-4-2-cpx-c	47.462	2.563	6.932	7.199	0.124	12.419	22.376	0.595	0.003	0.043	0	0.123	99.674
ZLDL1-3-5-1-cpx-c	50.343	1.512	4.26	6.65	0.121	14.029	21.769	0.563	0.023	0.427	0.029	0.068	99.269
ZLDL1-3-5-2-cpx-r	47.55	2.63	7.114	7.094	0.146	12.605	22.024	0.641	0.008	0.656	0.021	0.067	99.81
ZLDL1-3-5-2-cpx-c	51.401	1.178	3.903	6.429	0.085	14.734	22.126	0.539	0.01	0.221		0.055	100.681
ZLDL1-3-5-2-cpx-r	46.322	3.063	7.24	8.107	0.099	11.826	22.339	0.577	0.061	0.044	0.026	0.003	99.707
ZLDL1-3-5-3-cpx-r	49.141	0.358	4.178	6.508	0.079	13.913	23.672	0.505	0.008				98.364
ZLDL1-3-5-3-cpx-c	50.714	1.301	4.323	6.225	0.107	14.486	22.619	0.534	0.01	0.329		0.012	100.66
ZLDL1-3-5-3-cpx-r	50.179	1.386	4.329	6.551	0.115	14.43	22.566	0.525	0.007	0.322	0.006		100.416
ZLDL1-3-5-4-cpx-c	49.284	0.403	4.08	6.495	0.115	13.887	23.515	0.475	0.013				98.267
ZLDL1-3-5-4-cpx-r	49.134	0.385	3.965	6.612	0.1	13.959	23.357	0.521	0.014				98.047
ZLDL1-3-5-4-cpx-c	49.232	1.414	3.82	6.308	0.119	14.688	20.81	0.54	0.004	1.566	0.018		98.519
ZLDL1-3-5-4-cpx-r	49.017	1.569	4.066	6.555	0.105	14.428	20.841	0.55	0.031	1.409	0.029		98.599
ZLDL1-3-6-1-cpx-c	46.892	2.546	6.949	7.267	0.108	12.219	22.327	0.608	0.022	0.237	0.01	0	98.938
ZLDL1-3-6-1-cpx-c	46.884	2.578	7.151	7.489	0.106	12.675	22.46	0.622	0.007	0.025			99.997
ZLDL1-3-6-1-cpx-r	49.866	1.393	4.215	6.95	0.085	14.212	22.699	0.476	0.015	0.126	0.012	0.011	100.06
ZLDL1-3-6-3-cpx-r	50.291	1.576	4.075	6.723	0.151	14.117	22.428	0	0	0.115	0.046	0.047	99.36
ZLDL1-3-7-1-cpx-c	47.689	2.58	6.916	7.144	0.101	12.555	22.527	0.617	0.012	0	0.048	0.064	100.141
ZLDL1-3-8cpx-c1	49.249	2.103	4.666	7.569	0.193	13.409	21.854	0.62	0.005	0.112	0.019		99.799
ZLDL1-3-8cpx-c2	45.751	2.762	7.64	7.638	0.148	12.084	22.332	0.611	0.016	0.166	0.025		99.173
ZLDL1-3-8cpx-c3	44.468	3.385	8.614	8.113	0.123	11.567	22.105	0.621	0.01	0.094	0.037	0.011	99.148
ZLDL1-3-8cpx-c4	45.116	3.026	8.119	7.575	0.114	11.969	22.216	0.66	0.015	0.049	0.022	0.01	98.891
ZLDL1-3-8cpx-c5	43.443	3.859	9.562	8.362	0.138	11.083	21.877	0.706	0.003	0.076	0.031	0.029	99.169
ZLDL1-3-8cpx-r1	46.703	2.411	6.985	6.483	0.031	12.735	22.199	0.639	0.006	0.724	0.017	0.022	98.955
ZLDL1-3-8cpx-r2	47.573	2.106	6.09	6.664	0.11	13.279	22.659	0.593	0.008	0.414	0.018		99.514
ZLDL1-3-8cpx-r3	46.066	2.938	7.763	7.409	0.077	12.576	22.295	0.685	0.032	0.355	0.025	0.028	100.249
ZLDL1-6-1-1-cpx-c	49.844	1.477	4.117	6.519	0.108	14.205	22.717	0.521	0	0.382	0.028	0.02	99.508
ZLDL1-6-1-2-cpx-c	46.282	2.653	7	7.52	0.107	12.59	22.259	0.612	0.01	0.519	0.064	0.004	99.032
ZLDL1-6-3-2-cpx-c	47.659	2.071	6.382	6.897	0.141	13.118	22.4	0.585	0.01	0.473	0.027	0	99.264
ZLDL1-6-3-2-cpx-r	48.422	2.068	6.153	7.065	0.098	13.077	22.479	0.639	0.024	0.309		0.022	100.356
ZLDL1-6-5-2-cpx-c	49.379	1.663	4.345	6.766	0.114	13.639	21.93	0.538	0	0.534	0.007	0	98.375
ZLDL1-6-5-2-CPx-r	50.607	1.402	3.913	7.031	0.159	14.956	22.486	0.528	0.023	0.234	0.057	0.036	101.432
ZLDL1-6-7-2-cpx-c	47.609	2.303	6.696	6.989	0.137	12.691	22.432	0.569	0.003	0.32	0.031	0	99.429
ZLDL1-6-7-3-cpx-c	47.912	2.367	6.272	7.055	0.108	12.813	22.35	0.572	0.008	0	0.025	0.104	99.456
ZLDL1-6-8-1-cpx-c	49.301	1.566	4.289	6.62	0.118	14.108	22.411	0.499	0.002	0.244	0.01	0.059	98.913
ZLDL1-6-8-2-cpx-m	47.86	2.154	6.086	6.953	0.126	13.312	22.359	0.575	0	0.525	0.031	0.119	99.425
ZLDL1-6-8-3-cpx-r	47.444	2.283	6.917	7.386	0.074	12.774	22.509	0.623	0.007	0.496	0.007	0.073	100.017
ZLDL1-6-8-4-cpx-c	47.769	2.315	7.052	8.458	0.143	12.437	21.674	0.656	0.007	0.03	0.028	0.049	100.511
ZLDL1-6-8-4-CPX-R	50.418	1.42	4.271	5.922	0.141	14.813	22.64	0.53		0.171	0.004	0.051	100.381
ZLDL1-6-8-5-cpx-c	48.515	2.147	6.383	7.179	0.1	13.033	22.409	0.568	0.002	0.473	0.064	0.09	100.335
ZLDL1-6-8-6-cpx-c	46.805	2.714	7.202	7.631	0.11	12.563	22.422	0.606	0.01	0.282	0	0.04	100.063
ZLDL1-6-8-7-cpx-c	46.994	2.748	7.219	7.49	0.091	12.434	22.174	0.588	0	0.35	0.048	0.039	99.739
ZLDL1-6-9-1-cpx-c	49.605	1.51	4.144	6.364	0.139	14.35	22.461	0.5	0.007	0.411	0.012	0.088	99.079
ZLDL1-6-9-1-cpx-c	50.022	1.795	5.306	6.689	0.043	13.765	22.665	0.494	0.004	0.158	0.009	0.009	100.959
ZLDL1-6-9-cpx-r	51.969	1.387	4.073	6.335	0.099	14.386	22.596	0.445	0.027	0.24	0.02	0.016	101.593
ZLDL1-6-7-2-cpx-r	46.754	2.83	6.734	8.33	0.148	11.921	22.753	0.682	0.011	0.038	0.084	0.012	100.297
ZLDL3-1-1-1-cpx-r	49.066	1.726	4.431	7.897	0.163	13.4	22.084	0.589	0.019	0.068	0.047	0.124	99.374
ZLDL3-1-1-2-cpx-c	48.049	2.234	5.695	8.33	0.139	12.421	22.263	0.626	0.012	0.023	0.042	0	99.769
ZLDL3-1-1-2-cpx-r	48.134	2.162	6.056	8.124	0.164	13.061	22.235	0.684			0.042		100.662
ZLDL3-1-2-1-cpx-c	46.153	2.68	6.967	7.952	0.179	11.937	21.901	0.772	0.031	0	0.062	0	98.571
ZLDL3-1-2-2-cpx-c	46.865	2.721	6.808	8.554	0.166	12.139	21.892	0.717	0	0.167	0.008	0.101	99.862
ZLDL3-1-2-2-cpx-r	48.023	2.641	5.889	8.608	0.076	12.269	22.187	0.555	0.003	0.119			100.37
ZLDL3-1-4-1-cpx-c	46.984	2.643	6.336	8.693	0.164	11.944	21.989	0.664	0.007	0	0.037	0	99.425
ZLDL3-1-4-1-cpx-r	46.191	3.212	8.055	7.971	0.102	11.885	22.014	0.625		0.05	0.011	0.025	100.141
ZLDL3-1-8-1-cpx-c	47.255	2.369	6.047	8.256	0.134	12.557	22.074	0.69	0.003	0.046	0.077	0	99.384
ZLDL3-1-8-1-cpx-r	47.604	2.8	6.926	8.417	0.205	12.189	22.306	0.582	0.035	0.044	0.025	0.107	101.24
ZLDL3-1-10-1-cpx-c	49.325	1.646	4.144	8.001	0.142	13.535	21.958	0.567	0.007	0.008	0.025	0	99.325
ZLDL3-1-10-2-cpx-c	46.82	2.718	6.635	8.347	0.188	12.148	22.087	0.699	0.001	0	0.003	0	99.644
ZLDL3-1-11-1-cpx-c	47.279	2.485	6.331	8.47	0.186	12.367	22.069	0.674	0.006	0.023	0.044	0	99.867
ZLDL3-1-11-2-cpx-c	45.146	3.273	8.049	8.804	0.127	11.581	21.64	0.733	0	0	0.027	0.025	99.351
ZLDL3-1-12-3-cpx-c	48.842	1.802	4.837	8.194	0.151	13.459	21.944	0.61	0.005	0.023	0.021	0	99.844
ZLDL3-1-12-4-cpx-c	49.745	1.575	4.252	8.024	0.18	13.677	21.71	0.601	0.008	0	0.06	0.026	99.773
ZLDL3-1-12-5-cpx-c	49.054	1.838	4.816	8.106	0.153	13.332	21.848	0.614	0.008	0.038	0.023	0	99.77
ZLDL3-1-12-5-cpx-r	48.234	2.696	5.53	8.648	0.224	12.238	22.494	0.656	0.014		0.047		100.781
ZLDL3-1-13-2-cpx-c	47.466	2.173	5.438	8.161	0.192	12.701	21.825	0.653	0	0	0.073	0	98.609
ZLDL3-1-13-2-cpx-r	50.209	1.984	3.997	8.076	0.259	13.188	22.567	0.46	0.012		0.025	0.092	100.869
ZLDL3-2-1-1-cpx-c	49.454	1.522	3.873	7.965	0.136	14.011	21.644	0.514	0.017	0.015	0.054	0.088	99.135
ZLDL3-2-1-1-cpx-r	48.431	2.462	6.417	8.014	0.184	12.71	21.762	0.517	0.007		0.016	0.06	100.58
ZLDL3-2-2-1-cpx-r	47.642	2.796	6.936	8.253	0.239	12.412	21.475	0.665	0.022		0.049		100.489
ZLDL3-2-2-1-cpx-c	50.648	1.492	4.038	8.16	0.165	14.232	21.762	0.428	0.019		0.038		100.982
ZLDL3-2-2-1-cpx-c	46.839	2.748	6.541	8.395	0.117	12.198	22.172	0.663	0.009	0	0.036	0.043	99.683
ZLDL3-2-3-1-cpx-c	49.673	1.65	4.072	8.134	0.146	13.573	21.609	0.566	0.013	0	0.037	0.027	99.434
ZLDL3-2-3-1-cpx-r	46.895	3.215	7.055	8.222	0.124	11.889	22.244	0.596	0.014	0.107	0.04		100.401
ZLDL3-2-3-2-cpx-c	46.25	2.822	6.991	8.441	0.156	12.05	21.818	0.686	0.005	0	0.06	0.034	99.218
ZLDL3-2-4-2-cpx-r	47.431	2.617	6.485	8.137	0.159	12.105	22.297	0.665	0.006	0	0.041	0	99.902
ZLDL3-2-4-3-cpx-c	49.562	1.579	4.015	8.11	0.154	13.688	22.119	0.563	0.001	0	0.047	0	99.791
ZLDL3-2-4-3-cpx-r	49.904	1.997	4.438	8.735	0.137	13.891	21.625	0.492	0.012		0.064	0.05	101.345
ZLDL3-2-4-cpx-r	47.431	2.617	6.485	8.137	0.159	12.105	22.297	0.665	0.006			0	99.902
ZLDL3-2-5-4-cpx-c	47.865	2.311	5.96	8.443	0.146	12.328	21.86	0.667	0.011	0	0.023	0.002	99.59
ZLDL3-2-5-4-cpx-r	47.007	3.034	7.191	8.323	0.088	12.06	22.112	0.552	0.004	0.044	0.049		100.464
ZLDL3-2-5-5-cpx-c	48.352	1.898	4.856	7.76	0.16	13.554	22.122	0.6	0.008	0	0.059	0.019	99.31
ZLDL3-2-5-5-cpx-r	47.921	3.041	6.4	8.483	0.23	12.276	22.417	0.572	0.021		0.019		101.38
ZLDL3-2-6-1-cpx-c	49.44	1.634	4.051	7.61	0.121	14.029	21.924	0.579	0.015	0.084	0.006	0.053	99.403
ZLDL3-2-7-1-cpx-c	46.212	2.72	6.56	8.459	0.153	11.905	22.143	0.715	0.005	0.015	0.028	0	98.871
ZLDL3-2-7-1-cpx-r	47.231	2.759	6.89	8.571	0.242	12.484	22.094	0.69			0.018	0.028	101.007
ZLDL3-2-7-2-cpx-c	44.675	3.843	8.404	9.189	0.136	11.183	21.508	0.717	0.007	0.068	0.067	0.046	99.662
ZLDL3-2-7-3-cpx-c	46.832	2.648	6.355	8.44	0.124	12.473	22.137	0.655	0.005	0.526	0.014	0	99.67
ZLDL3-2-7-4-cpx-c	50.012	1.535	3.564	8.023	0.186	13.89	21.758	0.54	0.009	0.007	0.026	0.126	99.517
ZLDL3-2-7-5-cpx-c	49.014	1.705	3.962	7.741	0.165	13.454	21.922	0.588	0.006	0.023	0.017	0.002	98.557
ZLDL3-2-8-1-cpx-c	48.67	1.803	4.602	7.765	0.172	13.613	22.2	0.602	0.011	0.015	0.068	0	99.438
ZLDL3-2-8-2-cpx-c	45.506	3.036	7.181	8.585	0.12	12.123	21.813	0.688	0.009	0	0.006	0.049	99.062
ZLDL3-2-8-3-cpx-c	45.545	3.175	7.37	8.443	0.148	12.012	22.139	0.694	0.007	0	0.047	0	99.532
ZLDL3-2-8-3-cpx-r	47.296	2.881	6.807	8.61	0.129	12.402	21.789	0.708	0.001	0.056		0.022	100.701
ZLDL3-2-9-1-cpx-c	45.653	2.652	7.811	8.032	0.142	12.048	22.015	0.704	0	0.053	0.041	0	99.057
ZLDL3-2-9-1-cpx-r	47.425	2.674	7.858	7.831	0.058	12.468	21.822	0.607	0.037	0.088		0.08	100.948
ZLDL3-2-10-1-cpx-c	49.487	1.567	3.967	7.873	0.169	13.571	22.1	0.618	0.005	0	0.034	0.049	99.357
ZLDL3-2-10-1-cpx-r	50.662	1.852	3.988	7.616	0.135	14.235	22.394	0.454	0.003		0.049		101.388
ZLDL3-2-10-2-cpx-r	46.492	3.073	7.016	8.278	0.141	11.921	22.021	0.655	0.012	0.008	0.023	0.031	99.61
ZLDL3-2-11-4-cpx-c	46.785	2.43	6.391	8.033	0.114	12.398	21.829	0.693	0.016	0.081	1.037	0	98.689
ZLDL3-2-11-5-cpx-c	48.572	1.657	4.244	8.165	0.146	13.525	21.537	0.619	0.024	0	0.05	0.022	98.489
ZLDL3-2-11-5-cpx-r	47.341	2.951	6.621	8.316	0.175	12.173	21.665	0.566	0.052		0.074		99.934
ZLDL3-2-12cpx-c1	49.816	1.587	4.198	8.177	0.152	13.898	21.857	0.627		0.022	0.016	0.004	100.354
ZLDL3-2-12cpx-c2	49.939	1.689	4.215	7.936	0.106	13.918	21.919	0.571	0.005		0.006		100.304
ZLDL3-2-12cpx-r1	45.751	3.189	8.121	8.971	0.112	11.715	21.583	0.762	0.004		0.015		100.223
ZLDL3-2-12cpx-r2	46.702	2.655	7.049	8.422	0.155	12.477	21.993	0.673	0.004	0.018	0.062		100.21
ZLDL3-2-12cpx-r3	45.849	3.113	7.9	8.146	0.139	11.757	21.728	0.742	0.006		0.033		99.413
ZLDL3-2-12cpx-r4	47.213	2.643	6.645	8.114	0.103	12.328	21.768	0.732	0.001		0.037	0.044	99.628
ZLDL3-3-1-2-cpx-c	47.224	2.364	5.866	8.242	0.162	12.464	22.159	0.702	0.015	0	0.115	0	99.199
ZLDL3-3-1-2-cpx-r	50.418	2.054	3.958	8.367	0.198	13.371	22.365	0.473	0.002	0.038			101.244
ZLDL3-3-1-3-cpx-c	48.89	1.918	4.423	8.024	0.179	13.317	22.133	0.567	0	0	0.205	0	99.451
ZLDL3-3-2-1-cpx-c	45.701	2.332	7.645	8.03	0.14	11.982	21.779	0.734	0.004	0	0.152	0.009	98.346
ZLDL3-3-2-1-cpx-r	48.149	2.464	6.632	7.747	0.068	12.827	22.173	0.673	0.013	0.05			100.796
ZLDL3-3-2-2-cpx-c	46.082	2.516	7.439	7.974	0.106	12.261	22.074	0.638	0.002	0	0.078	0	99.092
ZLDL3-3-3-1-cpx-c	49.156	1.984	4.478	8.311	0.204	13.457	21.751	0.561	0.01	0	0.022	0.004	99.912
ZLDL3-3-3-1-cpx-r	47.01	3.394	6.759	8.637	0.072	11.878	22.418	0.612	0.015		0.041		100.836
ZLDL3-3-3-2-cpx-c	48.319	1.81	5.511	7.651	0.12	13.348	22.043	0.612	0.01	0	0.102	0	99.424
ZLDL3-3-3-2-cpx-r	50.885	1.844	3.563	8.03	0.136	14.047	22.11	0.465	0.008	0.069	0.022	0.008	101.187
ZLDL3-3-3-3-cpx-c	45.614	2.677	7.717	8.109	0.124	12.317	22.018	0.776	0.047				99.4
ZLDL3-3-3-4-cpx-c	48.908	1.682	5.159	7.56	0.104	13.654	22.047	0.586	0.009	0	0.359	0	99.71
ZLDL3-3-3-4-cpx-r	46.868	2.574	7.286	7.918		12.802	21.877	0.596	0.018	0.132	0.028	0.002	100.101
ZLDL3-3-4-2-cpx-c	49.611	1.543	3.966	8.123	0.169	13.683	22.261	0.569	0.016				99.943
ZLDL3-3-4-2-cpx-r	47.569	2.783	5.524	8.331	0.11	12.315	22.289	0.524	0.039		0.024	0.01	99.518
ZLDL3-3-5-4-cpx-c	47.028	2.658	6.581	8.413	0.131	12.42	22.132	0.656	0	0	0.036	0.001	100.018
ZLDL3-3-5-4-cpx-c	45.609	2.566	6.452	8.277	0.15	13.231	20.52	0.912	0.339	0.045	0.045		98.146
ZLDL3-3-5-4-cpx-r	47.274	2.649	7.128	7.69	0.09	12.716	22.532	0.568	0.019		0.001	0.024	100.691
ZLDL3-3-6-1-cpx-c	49.407	1.695	4.262	7.996	0.165	13.536	21.967	0.58	0	0	0.98	0	99.608
ZLDL3-3-6-1-cpx-c	48.437	0.436	4.112	8.253	0.17	13.075	23.087	0.53	0.003				98.102
ZLDL3-3-6-1-cpx-c	50.626	1.664	4.172	8.167	0.189	14.104	22.051	0.578	0.007		0.034		101.592
ZLDL3-3-6-2-cpx-r	45.515	3.231	7.25	8.982	0.158	11.828	22.035	0.777	0.022	0.008	0.085	0.03	99.798
ZLDL3-3-8-1-cpx-c	48.605	1.914	4.833	8.156	0.152	13.226	21.446	0.594	0	0.053	0.231	0	98.927
ZLDL3-3-8-1-cpx-r	46.539	2.671	7.914	9.138	0.093	12.005	21.612	0.615			0.094	0.01	100.691
ZLDL3-3-8-2-cpx-c	44.81	3.337	8.228	8.775	0.147	11.365	21.858	0.79	0	0.008	0.093	0.042	99.309
ZLDL3-3-10-1-cpx-c	49.251	1.896	4.831	8.332	0.166	13.012	21.704	0.611	0				99.802
ZLDL3-3-10-1-cpx-r	48.744	2.698	5.552	8.352	0.113	12.83	22.069	0.52	0.035	0.006	0.027	0.004	100.95
ZLDL3-3-10-2-cpx-c	47.486	2.912	6.672	8.79	0.18	11.881	21.818	0.75	0.012				100.502
ZLDL3-3-11-1-cpx-c	48.671	2.043	5.027	7.586	0.121	13.363	21.948	0.939	0.075	0	0.063	0.043	99.774
ZLDL3-2-gm1	46.125	3.005	6.516	8.707	0.112	11.815	22.125	0.635	0.033				99.073
ZLDL1-3-gm-cpx	47.057	2.819	6.796	7.653	0.123	12.085	22.102	0.538	0.018	0.189	0.073		99.453
ZLDL1-6-GM-CPX	49.803	2.052	4.193	8.045	0.206	14.057	21.993	0.433	0.04	0.132	0.064	0.038	101.056
ZLDL3-1-gm-cpx	47.894	3.067	5.768	9.341	0.068	12.386	21.809	0.642	0.057		0.232	0.034	101.298
ZLDL3-3-gm-cpx	46.023	3.745	5.37	10.934	0.18	12.307	21.016	0.667	0.078	0.012	0.151		100.483
ZLDL1-3-Matri-cpx	48.146	2.326	4.455	7.473	0.131	13.031	21.909	0.417	0.098	0.054	0.097	0.017	98.154
NLDL1-1-2-2-cpx-r	49.654	1.554	4.616	8.852	0.121	13.922	20.701	0.518	0.014	0.056	0.037	0.062	100.107
NLDL1-1-3-3-cpx-r	48.891	1.358	4.598	7.69	0.146	14.322	20.851	0.526	0.008	0.296	0.012	0.04	98.391
NLDL1-1-3-3-cpx-r	49.41	1.743	4.805	8.45	0.107	13.807	20.703	0.509		0.144	0.007	0.009	99.694
NLDL1-1-12-2-cpx-c	49.577	1.246	3.767	8.062	0.145	14.652	20.726	0.488	0.005	0	0.048	0.049	98.668
NLDL1-1-16-1-cpx-r	49.662	1.203	3.752	8.272	0.138	14.85	19.799	0.542	0.011	0.106	0.041	0	98.229
NLDL1-1-16-cpx-r	50.371	1.45	4.654	8.514	0.26	13.933	21.123	0.522	0.01	0.094	0.027	0.032	100.99
NLDL1-1-16-2-cpx-r	49.233	1.391	5.094	8.065	0.138	14.344	20.043	0.566	0.005	0.182	0.046	0	98.878
NLDL1-1-16-cpx-c	51.183	1.11	4.02	7.432	0.18	14.869	20.943	0.48	0.009	0.277	0.03	0.066	100.599
NLDL1-2-5-1-cpx-r	50.954	1.06	2.988	8.498	0.217	14.857	20.199	0.501	0.004	0.213	0.014	0	99.277
NLDL1-2-5-2-cpx-m	49.793	1.474	4.642	7.896	0.165	13.97	20.927	0.517	0.011	0.182	0.03	0	99.395
NLDL1-2-5-3-cpx-c	49.196	1.596	4.788	8.159	0.147	13.747	20.963	0.555	0.005	0.418	0.016	0	99.157
NLDL1-2-5-cpx-m	49.793	1.474	4.642	7.896	0.165	13.97	20.927	0.517	0.011				99.395
NLDL1-2-5-cpx-r	50.954	1.06	2.988	8.498	0.217	14.857	20.199	0.501	0.004				99.277
NLDL1-2-5-5-cpx-c	49.868	1.599	4.748	8.257	0.144	13.844	20.838	0.533	0.01	0.425	0.042	0.033	99.84
NLDL1-2-5-5-cpx-r	49.5	1.403	4.812	7.672	0.136	14.269	21.192	0.524	0.023	0.409	0.007	0.001	99.948
NLDL1-2-9-1-cpx-c	47.739	2.237	5.501	9.588	0.193	13.219	20.829	0.644	0.006	0.061	0.05	0.052	99.954
NLDL1-2-9-1-cpx-r	50.545	1.435	3.5	8.499	0.186	14.725	20.573	0.403		0.126	0.023		100.015
NLDL2-1-4-1-cpx-c	48.997	1.227	4.55	6.989	0.162	15.223	21.316	0.528	0	0.562	0.027	0.004	98.992
NLDL2-1-4-2-cpx-c	49.185	1.167	4.411	6.901	0.137	15.307	21.181	0	0.015	0.213	0	0.061	98.303
NLDL2-1-5-4-cpx-c	47.251	1.707	5.229	8.633	0.149	14.072	20.684	0.586	0.015	0.266	0.035	0	98.325
NLDL2-1-5-4-cpx-r	49.62	1.396	5.201	7.172	0.161	14.199	21.302	0.499	0.009	0.359			99.918
NLDL2-1-5-5-cpx-c	49.731	1.234	3.368	8.744	0.216	14.961	20.642	0.624	0.024	0.212	0.047	0.06	99.542
NLDL2-1-5-5-cpx-r	49.301	1.56	5.308	7.547	0.158	14.091	21.178	0.526	0.008	0.447	0.022	0.002	100.148
NLDL2-1-6-3-cpx-c	49.72	1.178	4.057	7.929	0.152	15.654	20.363	0.56	0.022	0.197	0.027	0	99.635
NLDL2-1-6-4-cpx-c	50.286	1.14	3.759	8.372	0.147	15.456	20.319	0.588	0.011	0.265	0	0	100.076
NLDL2-1-6-4-cpx-r	48.055	1.109	3.737	7.223	0.151	16.239	19.18	0.524	0.009	1.773	0.017		98.018
NLDL2-1-6-4-cpx-r	51.331	1.055	3.66	7.053	0.153	14.91	21.146	0.481	0.022	0.321	0.031	0.066	100.229
NLDL2-1-8-2-cpx-c	50.245	0.282	4.371	7.912	0.182	14.752	20.643	0.536	0.004				98.927
NLDL2-1-8-2-cpx-r	49.042	1.564	5.37	7.641	0.071	13.972	21.232	0.528	0.004	0.333	0.056	0.049	99.862
NLDL2-1-8-3-cpx-r	48.706	2.041	5.048	8.644	0.192	12.906	20.904	0.586	0.023	0.533	0.078		99.661
NLDL2-1-9-1-cpx-c	48.273	1.927	5.02	8.624	0.167	14.247	20.777	0.507	0.001	0.03	0.007	0.016	99.544
NLDL2-1-9-2-cpx-c	48.195	1.637	4.718	8.17	0.125	14.328	20.902	0.5	0	0.243	0.02	0.01	98.575
NLDL2-1-9-3-cpx-c	48.65	2.045	5.381	9.755	0.182	12.967	20.092	0.585	0.003	0.516	0.025	0.041	99.658
NLDL2-1-14CPX-1	48.892	1.819	4.453	8.2	0.187	13.676	21.283	0.454		0.161	0.028	0.004	99.157
NLDL2-1-14CPX-2	50.222	1.343	3.089	9.282	0.245	14.499	20.157	0.436		0.063	0.055		99.391
NLDL2-1-14CPX-3	46.938	2.564	6.02	9.346	0.154	12.636	20.818	0.571	0.004	0.036	0.041	0.036	99.164
NLDL2-1-14CPX-4	48.88	1.666	4.459	8.318	0.13	13.815	21.325	0.522	0.002	0.242		0.043	99.402
NLDL2-1-14CPX-5	47.953	1.995	5.47	8.742	0.146	13.259	20.985	0.609		0.161	0.004	0.045	99.369
NLDL2-1-14CPX-6	48.9	1.592	4.738	7.934	0.173	13.945	21.462	0.517	0.004	0.404			99.669
NLDL2-1-14CPX-7	47.221	2.098	6.49	7.858	0.157	13.017	21.215	0.535	0.002	0.493	0.04		99.126
NLDL2-1-14CPX-8	48.325	1.816	5.867	7.632	0.113	13.585	21.419	0.555		0.511	0.044	0.025	99.892
NLDL2-6-1-4-cpx-c	50.819	1.098	3.479	8.292	0.134	14.743	19.89	0.535	0.002				98.991
NLDL2-6-1-4-cpx-r	49.3	1.678	5.187	7.792	0.248	14.176	21.033	0.585	0.02	0.16	0.024	0.052	100.255
NLDL2-6-3-2-cpx-c	50.748	1.097	3.669	7.61	0.155	14.871	20.195	0.509	0.01				98.864
NLDL2-6-4-1-cpx-c	49.735	1.709	5.57	8.238	0.164	13.699	20.796	0.565	0				100.476
NLDL2-6-6-2-cpx-c	50.155	1.225	3.979	7.654	0.135	14.749	20.867	0.513	0				99.278
NLDL2-6-4-cpx-c	49.769	1.402	4.654	8.297	0.164	14.862	20.902	0.508	0.01	0.064	0.014	0.082	100.728
NLDL2-6-4-cpx-r	49.428	1.435	5.327	8.134	0.161	14.726	20.597	0.597	0.008	0.249	0.031	0.009	100.702
NLDL2-7-1-1-cpx-c	50.811	1.023	4.022	6.169	0.113	14.936	21.492	0.501	0.002				99.069
NLDL2-7-1-1-cpx-c	48.832	0.761	3.073	6.031	0.108	17.418	19.387	0.405	0	2.287	0		98.302
NLDL2-7-1-1-cpx-r	47.31	1.258	5.196	6.354	0.101	15.64	20.327	0.537	0	3.222	0		99.946
NLDL2-7-1-1-cpx-r	52.5	0.938	2.408	7.184	0.139	15.6	22.198	0.359		0.139	0.028	0.016	101.509
NLDL2-7-1-2-cpx-c	50.102	1.15	4.443	6.069	0.133	14.669	21.758	0.463	0				98.787
NLDL2-7-1-3-cpx-c	48.595	1.658	6.072	6.881	0.137	13.806	21.041	0.583	0.008				98.78
NLDL2-7-1-cpx-c	50.851	1.166	4.611	5.623	0.197	15.525	22.214	0.423		0.779	0.005	0.014	101.408
NLDL2-7-3-1-cpx-c	50.396	1.251	4.649	6.163	0.113	14.327	21.788	0.435	0				99.122
NLDL2-7-3-1-cpx-c	49.649	0.273	4.433	6.326	0.118	14.274	23.113	0.455	0				98.642
NLDL2-7-3-1-cpx-r	50.514	0.189	3.436	6.259	0.131	14.869	22.803	0.37	0.009				98.581
NLDL2-7-3-1-cpx-c	48.975	0.927	3.67	6.3	0.145	16.809	19.137	0.441	0.001	2.052	0		98.456
NLDL2-7-3-1-cpx-r	47.625	1.373	4.946	6.484	0.095	15.713	19.193	0.449	0.002	2.538	0.013		98.431
NLDL2-7-3-1-cpx-r	51.005	1.231	3.959	7.049	0.132	14.859	22.169	0.496	0.003	0.385	0.016		101.304
NLDL2-7-3-2-cpx-c	50.835	1.241	4.664	6.259	0.103	14.629	21.999	0.46	0.009				100.199
NLDL2-9-1-1-cpx-c	48.575	1.916	6.014	9.544	0.178	12.875	20.087	0.723	0.002				99.915
NLDL2-9-1CPX-1	49.776	1.579	4.238	9.044	0.137	14.03	20.88	0.559	0.003		0.018		100.264
NLDL2-9-1CPX-2	48.569	1.776	5.152	9.281	0.065	13.393	20.66	0.619		0.098	0.008	0.001	99.622
NLDL2-9-1CPX-3	47.71	1.867	6.243	9.112	0.221	12.832	20.207	0.715	0.003	0.009	0.044	0.029	98.992
NLDL2-9-1CPX-4	48.893	1.535	5.357	7.845	0.168	14.167	20.65	0.639	0.02	0.13	0.013	0.009	99.426
NLDL2-9-1CPX-5	48.459	1.647	5.57	7.88	0.241	13.663	21.131	0.55		0.237	0.015		99.393
NLDL2-9-1CPX-6	48.699	1.575	5.161	8.14	0.113	13.847	20.993	0.579	0.017	0.363	0.044	0.056	99.587
NLDL2-9-3-1-cpx-c	49.388	1.516	4.794	8.579	0.161	13.877	20.406	0.552	0				99.274
NLDL2-9-3-2-cpx-c	49.947	1.492	4.578	8.235	0.138	13.688	20.626	0.55	0				99.256
NLDL2-9-3-3-cpx-c	50.643	1.303	3.45	8.609	0.181	14.386	20.721	0.49	0				99.784
NLDL2-9-4-2-cpx-c	48.775	1.674	5.469	8.482	0.149	13.695	20.248	0.642	0				99.134
NLDL2-9-7-4-cpx-c	50.108	1.254	4.008	7.965	0.176	15.194	21.214	0.474	0				100.393
NLDL3-1-1-1-cpx-c	49.39	1.716	2.546	11.035	0.318	14.278	20.439	0.387	0.002				100.112
NLDL02-7-gm1	52.447	1.511	2.429	8.747	0.214	13.805	21.711	0.386	0.003				101.252
NLDL2-7-gm-cpx	51.627	1.314	3.589	7.675	0.179	14.66	21.26	0.486	0.009	0.39	0.024	0.104	101.317
HSS01-1-2-cpx-c	47.381	2.121	6.903	7.322	0.136	12.849	21.446	0.541	0.004	0.126			98.829
HSS01-1-2-cpx-r	50.871	1.413	3.282	6.843	0.138	13.92	21.827	0.333	0.009		0.044	0.027	98.707
HSS01-3-1-cpx-c	45.482	2.681	8.02	8.584	0.139	11.901	20.545	0.697	0.002				98.051
HSS01-3-1-cpx-c	47.759	2.321	7.035	7.9	0.135	12.492	19.346	0.628	0	0.432	0.02		98.068
HSS01-3-1-cpx-r	46.959	2.281	7.119	7.936	0.157	13.642	19.891	0.708	0.02	0.545	0.015		99.272
HSS01-4-1-cpx-c	49.39	1.513	4.425	7.663	0.162	13.785	21.135	0.549	0.008				98.63
HSS01-4-2-cpx-c	46.058	2.603	7.613	8.344	0.154	12.089	20.747	0.687	0				98.294
HSS01-6-1-cpx-c	48.303	1.571	6.045	7.642	0.101	13.211	20.821	0.62		0.101		0.013	98.428
HSS01-6-1-cpx-r	46.82	2.293	6.599	8.337	0.175	12.096	21.286	0.526	0.022	0.013	0.047		98.214
HSS01-10-2-cpx-c	48.795	1.568	4.859	7.692	0.155	13.622	21.049	0.839	0.135				98.714
HSS1-13CPX-1	48.856	1.856	4.536	8.719	0.251	14.164	20.069	0.548	0.004	0.049	0.091	0.025	99.168
HSS1-13CPX-2	45.038	3.145	8.19	9.089	0.187	11.464	21.012	0.728	0.004	0.054	0.054	0.029	98.994
HSS1-13CPX-3	46.208	2.722	6.758	8.64	0.199	11.929	21.295	0.699		0.004	0.052		98.506
HSS1-13CPX-4	46.853	2.346	6.076	8.531	0.165	12.851	21.521	0.583	0.006	0.009	0.022	0.019	98.982
HSS1-13CPX-5	44.921	2.814	8.026	8.416	0.194	11.899	21.384	0.685	0.005	0.112	0.044		98.5
HSS1-13CPX-6	44.9	2.883	8.124	8.659	0.097	11.763	21.283	0.7	0.01	0.107	0.035		98.561
HSS1-13CPX-7	48.068	1.666	5.383	7.698	0.202	13.267	21.702	0.536	0.009	0.018	0.027	0.081	98.657
HSS1-13CPX-8	50.08	1.429	3.31	7.727	0.205	14.352	22.027	0.381	0.012		0.022	0.017	99.562
HSS02-6-2-cpx-c	50.072	1.504	4.848	7.681	0.146	14.017	21.045	0.639	0				99.951
HSS02-6-2-cpx-c	50.544	1.23	4.454	7.082	0.067	14.314	21.32	0.582	0.001				99.594
HSS02-6-2-cpx-r	48.101	1.989	6.307	7.756	0.217	12.722	21.648	0.587	0.024	0.285	0.036	0.031	99.703
HSS02-9-1-cpx-c	47.407	2.311	6.845	8.36	0.142	12.51	21.575	0.636		0.05	0.014	0.048	99.898
HSS02-9-1-cpx-m	47.94	1.838	7.192	7.799	0.262	13.163	20.98	0.742	0.002	0.196	0.079	0.029	100.222
HSS02-9-1-cpx-r	44.141	3.466	8.623	9.338	0.107	11.35	21.175	0.539	0.026		0.018	0.013	98.796
HSS04-4-1-cpx-c	47.992	1.959	5.935	7.986	0.12	13.199	21.398	0.625	0				99.214
HSS04-4-1-cpx-c	50.427	1.231	4.224	7.28	0.135	14.415	21.327	0.579		0.114	0.011		99.743
HSS04-4-3-cpx-c	46.302	2.323	7.064	8.197	0.155	12.4	21.345	0.669	0.028				98.483
HSS04-5-1-cpx-c	45.691	2.648	8.025	8.437	0.102	11.98	21.149	0.714	0				98.744
HSS04-5-cpx-c	48.323	1.938	6.435	8.115	0.138	13.062	21.454	0.593	0.016	0.196	0.084	0.022	100.376
HSS04-5-cpx-r	47.398	2.285	7.033	8.191	0.106	12.591	21.338	0.652	0.043	0.164	0.002	0.042	99.845
HSS04-6-2-cpx-c	45.619	2.897	8.25	8.744	0.135	11.74	21.168	0.712	0				99.264
HSS04-6-2-cpx-c	46.516	2.448	7.606	8.617	0.183	12.329	21.185	0.773	0.008	0.114	0.028		99.807
HSS04-6-2-cpx-r	45.351	3.484	7.509	9.921	0.008	11.153	21.657	0.652		0.025	0.056		99.816
HSS04-6-3-cpx-c	49.653	1.521	4.488	7.8	0.122	13.86	21.183	0.546	0				99.173
HSS05-1-1-cpx-c	46.941	2.188	7.057	8.531	0.143	13.868	19.186	0.708	0.012	0.408	0.019		99.06
HSS05-1-1-cpx-r	48.946	2.09	4.213	9.314	0.154	14.036	19.006	0.574	0.043	0	0.048		98.423
HSS05-1-1-cpx-c	48.169	2.132	7.183	8.044	0.139	13.044	21.315	0.643	0.013	0.057	0.038	0.04	100.817
HSS05-1-1-cpx-r	46.094	3.393	7.235	8.654	0.059	11.888	21.739	0.605	0.018	0.025	0.043		99.753
HSS05-1-2-cpx-c	48.652	2.088	6.777	7.875	0.124	12.763	21.862	0.651	0				100.793
HSS06-2-1-cpx-c	46.393	2.679	8.343	8.764	0.127	12.204	21.007	0.725	0.007				100.249
HSS06-2-1-cpx-c	47.039	2.615	7.829	8.047	0.15	12.39	21.288	0.613	0.015	0.133	0.036		100.155
HSS06-2-1-cpx-r	45.223	3.709	7.656	9.099	0.142	11.732	21.864	0.627	0.009	0.013	0.113		100.187
HSS06-7-2-cpx-c	48.177	2.331	7.425	8.305	0.141	12.632	21.598	0.627	0				101.235
HSS06-7-2-cpx-c	48.726	2.001	6.646	8.026	0.141	13.344	21.423	0.576		0.24			101.123
HSS07-2-1-cpx-r	45.799	2.76	7.683	8.421	0.119	11.927	20.841	0.681	0.002				98.232
HSS07-2-1-Cpx-c	50.95	1.31	4.315	8.009	0.035	14.809	20.929	0.552	0.004	0.12	0.063		101.096
HSS07-2-1-Cpx-m1	47.959	2.113	7.155	7.996		12.869	21.364	0.606	0.007	0.088	0.037	0.038	100.232
HSS07-2-1-CPX-M2	47.998	2.108	6.872	8.255	0.086	13.029	21.358	0.576	0.014	0.177	0.033	0.063	100.569
HSS07-2-1-CPX-M3	48.044	2.05	6.737	8.054	0.169	13.053	21.818	0.605	0.009	0.076	0.04		100.655
HSS07-2-1-CPX-M4	47.163	2.545	7.586	8.346	0.109	12.67	21.519	0.731	0.028	0.088	0.077	0.061	100.923
HSS07-2-1-CPX-M5	47.511	2.164	6.944	8.313	0.144	13.081	21.707	0.61	0.017	0.038	0.056		100.585
HSS07-2-1-CPX-M6	46.426	3.199	7.325	8.998	0.139	12.361	22.077	0.612	0.011	0.063	0.03		101.241
HSS07-7-1-Cpx-c	50.828	1.258	4.719	8.022	0.12	14.528	21.404	0.556	0.014	0.139	0.052	0.055	101.695
HSS07-7-1-Cpx-r	47.061	2.791	6.786	9.151	0.005	12.366	22.237	0.559	0.023	0.006	0.078	0.038	101.101
HSS07-7-2-cpx-c	45.783	2.819	7.881	8.628	0.143	11.834	20.459	0.769	0.013				98.329
HSS07-7-2-Cpx-c	51.43	1.303	4.201	7.994	0.132	14.792	20.971	0.542	0.008	0.076	0.022	0.056	101.527
HSS07-7-2-Cpx-m	47.418	2.285	7.422	8.202	0.125	12.969	21.222	0.672	0.006	0.145	0.007		100.473
HSS07-7-2-Cpx-c	47.223	2.536	6.496	8.557	0.131	12.349	22.179	0.617	0.065		0.034		100.187
HSS07-9-3-cpx-c	49.748	1.623	4.267	8.439	0.183	13.993	20.123	0.575	0.015				98.966
HSS07-9-3-cpx-c	50.845	1.412	3.953	8.135	0.203	14.892	20.843	0.572	0.015		0.011	0.055	100.936
HSS07-9-3-cpx-r	48.924	2.165	5.993	7.985	0.073	13.684	21.878	0.642		0.183	0.028	0.055	101.61
HSS07-10-1-cpx-c	49.378	1.627	4.383	8.149	0.146	13.812	21.433	0.596	0				99.525
HSS07-10-1-CPX-M1	48.675	1.882	5.8	7.726	0.033	13.191	21.705	0.606	0.002		0.008	0.019	99.647
HSS07-10-1-CPX-R	48.228	2.172	6.309	8.676	0.223	12.731	21.865	0.558					100.762
HSS07-10-1-CPX-M2	48.862	1.748	6.6	8.023	0.187	13.003	21.565	0.695		0.133	0.037		100.853
HSS07-10-1-CPX-M3	49.069	1.742	5.982	7.82	0.198	13.382	21.664	0.607		0.101	0.052	0.013	100.63
HSS08-2-1-cpx-c	48.046	1.909	4.805	8.961	0.213	13.453	20.909	0.664	0.003				98.963
HSS08-2-1-cpx-c	50.068	1.701	4.77	8.62	0.178	13.502	21.743	0.681			0.007		101.27
HSS08-2-1-cpx-r	50.917	1.513	3.287	7.892	0.219	14.159	22.286	0.397	0.009		0.012	0.031	100.722
HSS08-2-2-cpx-c	48.705	1.836	4.642	8.418	0.182	14.289	21.219	0.6	0				99.89
HSS08-2-2-cpx-c	50.655	1.465	4.172	8.185	0.022	14.167	21.505	0.534		0.07	0.031	0.016	100.822
HSS08-2-2-cpx-r	45.646	3.232	8.286	9.684	0.1	11.407	21.929	0.556	0.018	0.019	0.047	0.017	100.941
HSS08-7-1-cpx-c	49.046	1.622	4.332	8.103	0.121	13.588	21.557	0.611	0.006				98.986
HSS08-7-2-cpx-c	47.627	2.223	6.02	8.631	0.201	13.339	21.755	0.642	0.02				100.459
HSS08-gm-cpx	47.233	2.323	5.272	10.159	0.229	13.071	20.476	0.564	0.02	0.057	0.099	0.047	99.55
HSS07-gm2	49.158	1.698	3.454	8.026	0.189	13.741	21.738	0.427	0.008				98.439
HSS01-gm-cpx	45.265	3.474	7.74	10.292	0.147	11.561	20.941	0.635	0.014		0.173		100.242
HSS02-gm2	44.645	4.06	8.04	9.471	0.154	10.94	21.707	0.635	0				99.652
HSS02-gm-cpx	50.746	1.485	3.132	8.914	0.123	14.135	21.803	0.378	0.029	0.019	0.22		100.984
HSS06-gm1	46.772	2.938	7.938	9.656	0.157	11.807	20.788	0.691	0.013				100.761
HNB1-1-1-1-cpx-c	50.095	1.445	4.456	8.018	0.101	13.933	20.539	0.57	0.007				99.164
HNB1-1-5-2-cpx-c	46.399	2.719	6.636	9.061	0.181	11.853	20.905	0.735	0.009				98.498
HNB1-2-4-3-cpx-c	47.609	2.378	6.747	8.524	0.135	12.281	21.391	0.602	0				99.667
HNB1-2-4-4-cpx-c	46.89	2.764	7.079	8.871	0.125	12.016	21.294	0.626	0.002				99.666
HNB1-2-4-4-cpx-c	48.308	2.416	6.506	8.442	0.11	13.746	19.134	0.565	0	0	0.026		99.252
HNB1-2-4-4-cpx-r	49.29	2.161	6.405	8.427	0.123	13.686	19.696	0.635	0	0.052	0.037		100.511
HNB1-2-5-2-cpx-c	46.921	2.334	6.932	8.038	0.164	12.616	21.286	0.625	0				98.917
HNB1-2-5-3-cpx-c	46.794	2.51	7.572	8.287	0.138	12.278	21.161	0.633	0.006				99.38
HNB1-2-5-3-cpx-c	46.61	0.599	6.928	8.33	0.113	12.492	22.766	0.604	0				98.443
HNB1-2-5-3-cpx-c	48.709	2.13	6.873	8.149	0.112	13.657	18.93	0.624	0	0.668	0		99.852
HNB1-2-5-3-cpx-r	49.503	1.921	6.333	7.894	0.137	13.999	19.485	0.615	0	0.869	0.007		100.761
HNB1-2-5-3-cpx-c	47.685	1.909	6.764	9.085	0.207	12.756	21.223	0.619	0.012	0.069	0.102	0.003	100.434
HNB1-2-5-3-cpx-r	48.428	1.929	6.641	7.955	0.114	13.337	21.356	0.597	0.011	0.063	0.053	0.096	100.58
HNB1-2-4-4-cpx-c	46.32	2.784	7.499	8.237	0.062	12.162	21.704	0.641	0.005		0.018		99.432
HNB1-5-1-3-cpx-c	45.231	3.073	8.336	8.784	0.14	11.559	20.641	0.685	0.006				98.453
HNB1-5-1-3-cpx-m	48.016	1.927	6.694	7.401	0.079	13.063	21.406	0.585		0.146	0.001		99.318
HNB1-5-1-3-cpx-r	48.458	2.069	5.503	9.013	0.193	12.861	21.965	0.54	0.005		0.089		100.696
HNB1-5-1-3-cpx-c	46.501	2.557	8.184	8.616	0.171	12.462	21.302	0.633	0.01	0.196	0.045		100.677
HNB1-5-5-1-cpx-c	48.592	1.862	5.39	7.791	0.146	13.017	20.947	0.607	0				98.352
HNB1-5-5-4-cpx-c	47.296	2.063	6.593	8.217	0.126	12.593	20.79	0.635	0				98.314
HNB1-5-5-4-cpx-c	51.165	1.295	4.312	7.442	0.165	14.66	21.08	0.56		0.102	0.001	0.047	100.829
HNB1-5-5-4-cpx-r	45.557	2.848	8.072	8.964	0.147	11.636	21.521	0.605	0.002	0.05	0.054	0.071	99.527
HNB1-5-5CPX-1	49.919	1.378	4.891	7.715	0.094	14.256	21.252	0.562	0.006	0.132	0	0	100.205
HNB1-5-5CPX-2	49.516	1.491	4.897	7.843	0.113	14.139	21.487	0.558	0.002	0.109	0.026	0	100.181
HNB1-5-5CPX-3	49.971	1.497	4.39	7.513	0.117	14.207	21.282	0.515	0	0.137	0.011	0.047	99.687
HNB1-5-5CPX-4	47.599	2.082	6.718	8.129	0.058	12.908	21.634	0.592	0.002	0.168	0.036	0.06	99.986
HNB1-5-5CPX-5	47.678	2.107	6.44	7.865	0.15	12.981	21.836	0.552	0	0.105	0.032	0	99.746
HNB1-5-5CPX-6	47.422	2.197	6.752	8.122	0.144	13.013	21.714	0.642	0	0.177	0.04	0.034	100.257
HNB1-5-5CPX-7	47.479	2.24	6.822	8.282	0.113	12.788	21.583	0.611	0	0.123	0.041	0.028	100.11
HNB1-5-10-1-cpx-c	49.864	1.419	4.207	7.619	0.16	13.86	20.805	0.608	0.007				98.549
HNB-ZM-1-1-cpx-c	47.066	2.749	7.655	8.661	0.109	12.346	21.28	0.684	0.003				100.553
HNB-ZM-1-1-Cpx-c	46.182	2.607	8.13	9.154	0.181	12.079	20.607	0.67	0.016	0.144	0.038	0.103	99.911
HNB-ZM-1-1-Cpx-r	47.764	1.95	6.76	8.212	0.192	12.584	21.331	0.659	0.009	0.138	0.057	0.1	99.756
HNB-ZM-3-1-cpx-c	49.783	1.481	4.957	7.57	0.175	13.948	21.184	0.589	0.013				99.701
HNB-ZM-3-1-cpx-c	47.739	2.055	6.256	7.917	0.112	13.828	19.921	0.622	0.023	0.406	0.024		98.904
HNB-ZM-3-1-cpx-r	48.13	2.151	5.143	8.146	0.167	14.249	20.019	0.537	0.031	0.088	0.037		98.699
HNB-ZM-3-1-cpx-r	49.276	1.418	5.141	7.065	0.12	13.629	21.068	0.528	0.008	0.107	0.031	0.035	98.426
HNB-ZM-8-1-cpx-r	48.437	0.342	4.662	7.69	0.114	13.551	22.554	0.631	0.03				98.01
HNB-ZM-9CPX-1	47.988	1.853	6.024	8.109	0.136	13.323	21.088	0.67	0.015	0.145	0.046	0	99.397
HNB-ZM-9CPX-2	49.296	1.454	4.74	7.471	0.153	14.081	21.032	0.59	0.014	0.077	0.035	0.027	98.97
HNB-ZM-9CPX-3	49.372	1.451	4.727	7.561	0.191	14.147	20.966	0.601	0.012	0.064	0	0.064	99.156
HNB-ZM-9CPX-4	47.296	2.251	7.075	8.055	0.115	12.787	21.536	0.726	0.018	0.114	0.023	0.013	100.009
HNB-ZM-9CPX-5	46.708	2.353	7.267	7.998	0.112	12.51	21.205	0.665	0.023	0.146	0.04	0	99.027
HNB-ZM-9CPX-6	44.339	3.367	8.838	9.561	0.146	11.359	21.14	0.664	0.022	0.068	0.079	0	99.583
HNB-ZM-9CPX-7	46.187	3.045	6.884	18.628	0.136	12.276	21.998	0.596	0.041	0	0.026	0	100.017
HS01-1-2-1-cpx-c	44.102	3.516	9.329	8.802	0.13	11.063	21.257	0.789	0				98.988
HS01-1-2-1-cpx-c	44.607	3.514	9.259	8.383	0.127	12.319	20.289	0.742	0.015	0.603	0.032		99.889
HS01-1-2-1-cpx-r	44.371	3.752	8.738	8.435	0.122	12.231	20.705	0.644	0.012	0.101	0.034		99.145
HS01-1-2-1-cpx-r	50.133	1.924	4.157	7.435	0.094	14.238	22.961	0.404	0.012		0.343		101.701
HS01-1-3-1-cpx-c	49.701	1.704	4.795	7.906	0.118	13.732	21.205	0.608	0				99.768
HS01-1-3-1-cpx-c	45.874	0.67	7.916	8.389	0.139	11.72	22.988	0.664	0				98.36
HS01-1-3-1-cpx-c	50.727	1.714	4.82	7.692	0.169	15.194	20.422	0.577	0.002	0.314	0.031		101.662
HS01-1-3-1-cpx-r	42.207	4.494	10.927	9.528	0.134	11.138	19.99	0.797	0	0.123	0.057		99.396
HS1-1-3CPX-1	49.334	1.665	4.868	7.35	0.117	14.049	21.729	0.586		0.108	0.011		99.817
HS1-1-3CPX-2	49.558	1.726	4.959	7.857	0.138	14.016	21.682	0.625		0.041	0.034		100.636
HS1-1-3CPX-3	43.907	3.623	9.669	8.57	0.134	11.188	21.844	0.676		0.157	0.051	0.03	99.849
HS1-1-3CPX-4	44.904	3.264	8.892	8.022	0.051	11.731	21.904	0.728		0.175	0.046		99.717
HS1-1-3CPX-5	43.924	3.855	9.72	8.632	0.144	11.166	21.65	0.766		0.108	0.031	0.042	100.038
HS1-1-3CPX-6	43.956	3.672	9.852	8.384	0.146	11.2	21.708	0.765		0.166	0.049		99.898
HS1-1-3CPX-7	44.306	3.75	9.602	8.507	0.161	11.16	21.597	0.752	0.015	0.206	0.035		100.091
HS1-1-3CPX-8	41.927	4.415	11.218	9.346	0.12	10.225	21.576	0.729	0.003	0.04	0.05		99.649
HS1-1-3CPX-9	44.58	3.67	8.643	8.198	0.107	11.476	22.5	0.63		0.009	0.048		99.861
HS1-1-3CPX-10	44.938	3.474	7.762	7.931	0.155	11.847	22.85	0.618	0.015	0.04	0.038	0.058	99.726
HS1-1-3CPX-11	47.157	2.73	6.211	8.36	0.17	12.493	22.539	0.557	0.006		0.063	0.012	100.298
HS1-1-3CPX-12	44.692	3.883	8.636	8.383	0.126	11.269	22.333	0.625	0.043	0.049	0.105		100.144
HS01-1-4-3-cpx-c	45.981	2.968	8.352	8.278	0.111	11.769	21.474	0.725	0.009				99.667
HS01-1-7-1-cpx-c	49.539	1.722	4.93	7.642	0.11	13.704	21.26	0.6	0				99.508
HS03-2-1-cpx-r	49.556	1.855	5.103	7.748	0.138	13.594	21.521	0.563	0.002				100.08
HS03-2-1-cpx-c	44.215	0.723	9.313	8.82	0.128	11.386	22.847	0.784	0.004				98.22
HS03-2-1-cpx-r	46.696	0.602	7.579	8.054	0.113	12.167	23.302	0.683	0				99.195
HS03-2-1-cpx-c	47.849	2.435	8.3	7.963	0.141	13.444	19.007	0.859	0.005	0.421	0.027		100.451
HS03-2-1-cpx-r	49.516	1.899	4.833	8.104	0.133	14.8	19.47	0.605	0.008	0.262	0.029		99.658
HS03-2-2-cpx-c	46.933	2.517	7.661	8.018	0.114	12.322	21.476	0.671	0.017				99.728
HS03-2-3-cpx-c	47.925	2.123	7.61	7.798	0.126	12.354	21.072	0.788	0				99.797
HS03-2-4-cpx-r	49.254	1.646	4.961	7.579	0.103	13.643	21.469	0.621	0				99.275
HS03-3-2-cpx-c	49.993	1.684	4.907	7.677	0.152	13.754	21.155	0.62	0				99.942
HS03-3-3-cpx-c	47.422	0.584	6.146	8.617	0.196	11.977	23.296	0.662	0				98.9
HS03-3-3-cpx-c	48.085	2.439	7.257	7.815	0.112	13.578	19.811	0.658	0	0.481	0.03		100.265
HS03-3-3-cpx-r	47.919	2.596	7.611	8.438	0.122	13.417	19.292	0.68	0.004	0.367	0.035		100.481
HS03-3CPX-1	47.07	2.591	6.877	8.328	0.108	12.307	21.879	0.708	0.006	0.027			99.901
HS03-3CPX-2	44.734	3.589	8.786	8.798	0.232	11.197	21.611	0.791	0.01		0.038	0.017	99.803
HS03-3CPX-3	44.972	3.357	8.312	8.178	0.1	11.639	22.399	0.586	0.006	0.103	0.06		99.712
HS03-3CPX-4	42.385	4.555	10.366	9.437	0.163	10.668	22.032	0.636	0.014		0.058	0.083	100.397
HS03-3CPX-5	45.665	3.357	7.737	8.059	0.144	11.903	22.922	0.614	0.026	0.067	0.047		100.541
HS03-3-4-cpx-c	46.563	2.566	7.738	8.057	0.126	12.178	21.826	0.694	0.007				99.755
HS03-3-5-cpx-c	43.982	3.821	9.584	8.794	0.106	10.966	21.235	0.739	0.001				99.228
HS03-4-1-cpx-c	49.204	1.737	4.74	7.624	0.119	13.623	21.451	0.705	0.039				99.242
HS03-5-1-cpx-c	49.38	1.735	4.562	8.243	0.154	13.486	21.605	0.612	0.011				99.786
HS03-5-2-cpx-c	46.776	2.942	7.722	8.733	0.121	11.756	21.496	0.707	0.011				100.264
HS03-7-1-cpx-c	48.276	2.336	7.173	8.382	0.112	12.531	21.334	0.665	0				100.808
HS03-7-2-cpx-c	45.834	2.795	8.108	8.298	0.107	11.95	21.53	0.694	0.002				99.32
HS03-7-3-cpx-c	48.558	2.028	5.806	7.69	0.14	13.411	21.477	0.594	0				99.706
HS03-9-cpx-c1	44.167	4.286	10.142	9.479	0.076	11.093	21.473	0.872	0.036	0.077	0.2	0.025	101.926
HS03-9-cpx-r4	43.595	4.989	9.848	9.523	0.203	10.501	22.236	0.666	0.029		0.116	0.097	101.803
HS03-gm1	43.273	4.122	9.163	8.703	0.13	10.963	21.945	0.611	0.012				98.921
HS03-gm2	44.28	4.021	8.536	8.787	0.117	11.02	21.631	0.636	0.024				99.054
HS03-gm3	44.182	4.269	8.857	8.85	0.143	10.889	21.855	0.546	0.035				99.627

## Sheet: Table S4
Table S4 Plagioclase compositions of the Wulanhada Volcanic Field.
Anaysis	SiO2 (wt%)	TiO2 (wt%)	Al2O3 (wt%)	FeO (wt%)	MnO(wt%)	MgO (wt%)	CaO (wt%)	Na2O (wt%)	K2O (wt%)	Cr2O3 (wt%)	P2O5 (wt%)	NiO(wt%)	Total
BLDL1-10-10PL-1	54.077	0.176	28.397	0.79	0.064	0.097	10.97	4.894	0.648		0.042		100.155
BLDL1-10-10PL-2	53.363	0.132	28.707	0.747	0.035	0.098	11.348	4.715	0.558	0.046	0.036		99.785
BLDL1-10-10PL-3	54.085	0.217	28.451	0.726		0.069	10.797	5.002	0.614		0.04	0.016	100.017
BLDL1-10-10PL-4	53.979	0.157	28.81	0.714	0.041	0.098	11.185	4.722	0.555	0.023	0.03		100.314
BLDL1-10-10PL-5	54.011	0.254	28.769	0.806	0.039	0.08	11.103	4.811	0.624	0.036	0.103	0.006	100.642
BLDL1-10-10PL-6	53.816	0.202	28.484	0.744	0.046	0.089	11.009	4.771	0.665		0.083	0.017	99.926
ZLDL3-1-5-1-C	52.921	0.075	28.895	0.55	0	0.087	11.367	5.031	0.462				99.388
ZLDL3-1-7-3-C	53.138	0.139	28.965	0.472	0	0.059	11.291	5.244	0.493				99.801
ZLDL3-1-7-2-M	53.104	0.119	29.086	0.374	0	0.059	11.491	5.041	0.459				99.734
ZLDL3-1-7-1-R	53.245	0.102	29.046	0.409	0	0.071	11.396	5.031	0.471				99.77
ZLDL3-1-12-1-C	52.956	0.072	29.065	0.51	0.011	0.069	11.558	4.959	0.43				99.629
ZLDL3-1-12-2-M	52.335	0.086	29.693	0.475	0.008	0.063	12.183	4.652	0.406				99.903
ZLDL3-2-3-3-C	53.326	0.091	28.94	0.441	0	0.079	11.382	5.094	0.478				99.831
ZLDL3-2-3-3-pl-C	55.226	0.122	28.016	0.492	0.009	0.069	11.201	4.742	0.474	0.006	0.014	0.091	100.462
ZLDL3-2-3-3-pl-R	54.961	0.13	27.862	0.456	0	0.087	10.975	5.043	0.499	0.025	0.032	0.017	100.087
ZLDL3-2-5-3-C	53.506	0.114	29.179	0.471	0	0.066	11.509	5.061	0.47				100.375
ZLDL3-2-5-2-M	52.964	0.097	29.112	0.37	0	0.059	11.439	5.028	0.458				99.527
ZLDL3-2-5-1-R	52.744	0.111	29.451	0.427	0.019	0.072	12.02	4.791	0.426				100.06
ZLDL3-2-5PL-C1	52.719	0.14	29.623	0.482		0.063	12.233	4.442	0.384		0.025	0.033	100.144
ZLDL3-2-5PL-C2	53.981	0.082	28.73	0.323		0.076	11.288	4.875	0.454	0.009	0.011		99.829
ZLDL3-2-5PL-M1	54.377	0.078	28.445	0.354	0.027	0.071	10.844	5.154	0.516	0.018	0.036		99.92
ZLDL3-2-5PL-M2	54.046	0.124	28.317	0.382	0.012	0.05	10.766	5.201	0.546	0.018			99.462
ZLDL3-2-5PL-M3	53.325	0.114	29.281	0.323	0.01	0.062	11.751	4.737	0.412		0.016		100.031
ZLDL3-2-5PL-R	52.373	0.125	29.388	0.536		0.075	12.141	4.353	0.39	0.005	0.061		99.447
ZLDL3-2-11-1-C	51.383	0.045	29.2	0.444	0.008	0.061	12.389	4.551	0.415				98.497
ZLDL3-2-11-1-M	51.937	0.037	29.161	0.407	0.012	0.062	12.132	4.737	0.428				98.912
ZLDL3-2-11-1-R	53.024	0.102	29.152	0.355	0.001	0.039	11.655	4.942	0.446				99.715
ZLDL3-2-11-2-M	53.214	0.104	28.761	0.384	0	0.053	10.944	5.376	0.529				99.366
ZLDL3-2-11-1-R	51.992	0.013	29.083	0.431	0	0.062	12.159	4.745	0.459				98.944
ZLDL3-2-11-3-C	52.664	0.113	29.453	0.467	0.002	0.076	11.927	4.838	0.436				99.977
ZLDL3-2-11-6-M	52.963	0.04	28.654	0.421	0	0.079	11.437	4.7	0.444				98.738
ZLDL3-2-3-3-pl-C	55.226	0.122	28.016	0.492	0.009	0.069	11.201	4.742	0.474	0.006	0.014	0.091	100.462
ZLDL3-2-13PL-C1	53.963	0.167	28.314	0.354	0.038	0.056	11.063	4.815	0.511	0.005	0.03	0.015	99.331
ZLDL3-2-13PL-C2	53.713	0.091	28.357	0.365	0.007	0.055	10.71	5.167	0.514		0.013		98.992
ZLDL3-2-13PL-M1	53.285	0.082	28.885	0.369	0.014	0.091	11.414	4.797	0.496	0.014	0.026	0.035	99.508
ZLDL3-2-13PL-M2	53.83	0.055	28.691	0.424	0.043	0.073	11.187	4.63	0.489		0.022		99.444
ZLDL3-2-13PL-M3	53.045	0.109	29.071	0.415	0.019	0.067	11.67	4.626	0.417	0.027	0.025	0.051	99.542
ZLDL3-2-13PL-M4	53.497	0.099	28.863	0.298		0.04	11.224	4.801	0.49	0.009	0.045		99.366
ZLDL3-2-13PL-R	52.748	0.19	29.354	0.612	0.031	0.074	11.997	4.517	0.403		0.052	0.022	100
ZLDL3-3-1-1-C	53.079	0.157	28.798	0.49	0	0.063	11.445	5.065	0.508				99.605
ZLDL3-3-5-2-M	52.914	0.126	29.389	0.465	0.027	0.072	12.11	4.868	0.452				100.422
ZLDL3-3-5-3-C	51.533	0.095	29.733	0.489	0	0.074	12.408	4.609	0.394				99.335
ZLDL3-3-5-1-R	52.787	0.146	29.364	0.47	0	0.074	11.616	5.05	0.455				99.961
ZLDL3-3-9-1-C	52.948	0.106	29.221	0.468	0.015	0.064	11.722	4.883	0.437				99.864
ZLDL3-3-9-2-C	52.927	0.107	29.413	0.395	0	0.063	11.554	5.032	0.45				99.94
ZLDL3-3-9-2-M	51.495	0.012	29.282	0.491	0.004	0.065	12.59	4.333	0.387				98.659
ZLDL3-3-9-2-C	51.063	0.023	29.282	0.472	0.016	0.051	12.589	4.535	0.394				98.424
ZLDL3-3-9-2-R	52.319	0.041	28.805	0.434	0	0.039	11.882	4.878	0.483				98.88
NLDL1-1-1-1-C	52.315	0.094	27.974	0.445	0	0.101	11.698	5.018	0.362				98.008
NLDL1-1-1-2-M	53.39	0.122	27.711	0.488	0	0.109	11.462	5.181	0.362				98.824
NLDL1-1-1-3-R	52.878	0.13	27.845	0.476	0	0.097	11.6	5.035	0.371				98.432
NLDL1-1-2-1-C	53.019	0.087	27.981	0.503	0	0.12	11.764	5.033	0.36				98.867
NLDL1-1-4-1-C	52.255	0.108	28.061	0.458	0	0.106	11.72	5.032	0.376				98.117
NLDL1-1-4-3-C	52.416	0.091	28.097	0.59	0	0.088	11.795	5.091	0.51				98.68
NLDL1-1-5-2-C	52.243	0.09	28.17	0.54	0	0.094	11.683	5.192	0.581				98.593
NLDL1-1-6-1-C	52.734	0.103	27.891	0.503	0.003	0.106	11.594	5.118	0.357				98.409
NLDL1-1-6-2-C	51.063	0.138	28.935	0.578	0	0.109	12.606	4.385	0.277				98.092
NLDL1-1-8-1-C	52.459	0.104	27.954	0.537	0	0.095	11.534	5.151	0.422				98.255
NLDL1-1-9-1-C	52.103	0.104	28.158	0.504	0	0.096	11.74	4.994	0.399				98.099
NLDL1-1-10-1-C	51.988	0.099	28.467	0.501	0	0.111	12.052	4.703	0.323				98.244
NLDL1-1-10-2-M	52.808	0.106	27.572	0.499	0.021	0.119	11.497	5.037	0.362				98.022
NLDL1-1-14-1-C	52.073	0.114	28.261	0.453	0.003	0.127	11.716	5.204	0.389				98.339
NLDL1-1-15-1-C	52.714	0.101	29.553	0.52	0.01	0.099	12.195	4.707	0.33				100.228
NLDL1-2-3-1-C	51.635	0.079	29.426	0.477	0.011	0.109	12.117	4.734	0.313				98.902
NLDL1-2-3-2-M	52.474	0.083	28.774	0.488	0.015	0.103	11.581	4.951	0.323				98.793
NLDL1-2-3-3-R	52.45	0.103	28.794	0.457	0.021	0.102	11.562	4.941	0.356				98.786
NLDL1-2-4-3-C	52.167	0.086	28.952	0.56	0.008	0.094	11.628	4.942	0.346				98.783
NLDL1-2-4-4-C	51.936	0.094	29.185	0.586	0	0.109	11.767	4.786	0.33				98.791
NLDL1-2-5-4-C	53.439	0.071	29.853	0.512	0.009	0.113	12.369	4.688	0.275				101.33
NLDL1-2-5-6-C	52.279	0.111	28.955	0.51	0.021	0.091	11.723	4.901	0.372				98.964
NLDL1-2-6-3-C	52.592	0.12	28.669	0.456	0	0.086	11.564	5.28	0.448				99.215
NLDL1-2-6-2-M	52.353	0.013	28.83	0.534	0	0.106	11.488	5.232	0.409				98.966
NLDL1-2-6-1-R	53.14	0.086	27.868	0.534	0.007	0.064	10.796	5.575	0.462				98.533
NLDL1-2-8-1-C	51.413	0.104	29.11	0.562	0.028	0.094	12.136	4.895	0.371				98.712
NLDL1-2-8-2-C	52.845	0.094	28.235	0.557	0	0.094	11.23	5.469	0.474				98.999
NLDL1-2-8-3-C	51.871	0.063	28.985	0.492	0.031	0.106	11.821	5.084	0.399				98.851
NLDL1-2-9-2-C	52.448	0.078	28.77	0.562	0.016	0.078	11.475	4.945	0.367				98.738
NLDL2-1-2-1-C	51.638	0.108	29.423	0.494	0	0.11	12.265	4.986	0.436	0	0.026	0	99.46
NLDL2-1-3-1-C	52.302	0.08	29.197	0.553	0	0.104	12.231	4.596	0.308				99.372
NLDL2-1-3-2-C	52.025	0.115	29.317	0.548	0.006	0.102	12.106	4.763	0.323				99.306
NLDL2-1-5-3-C	52.049	0.116	29.049	0.55	0	0.088	11.729	4.85	0.336				98.767
NLDL2-1-5-2-M	53.003	0.095	28.739	0.503	0	0.105	11.31	4.927	0.408				99.089
NLDL2-1-5-1-R	52.179	0.11	29.094	0.435	0	0.109	11.855	4.788	0.357				98.928
NLDL2-1-5-6-C	52.42	0.07	29.253	0.532	0	0.09	11.981	4.864	0.322				99.53
NLDL2-1-5-7-C	52.961	0.097	28.736	0.48	0.013	0.103	11.443	4.82	0.361				99.013
NLDL2-1-5-8-M	51.819	0.099	29.102	0.507	0.037	0.092	11.971	4.679	0.349				98.655
NLDL2-1-5-9-R	53.063	0.099	29.323	0.595	0.013	0.11	11.908	4.989	0.38				100.479
NLDL2-1-6-5-C	51.286	0.031	29.109	0.496	0.005	0.093	12.64	4.466	0.349				98.475
NLDL2-1-6-5-M	51.813	0.012	29.111	0.5	0	0.097	12.559	4.514	0.342				98.948
NLDL2-1-6-5-R	51.994	0.033	29.243	0.575	0.019	0.104	12.522	4.559	0.329				99.377
NLDL2-1-7-3-C	51.798	0.07	29.626	0.463	0	0.117	12.337	4.568	0.286				99.265
NLDL2-1-7-4-C	52.499	0.105	29.231	0.562	0.011	0.114	12.104	4.823	0.307				99.757
NLDL2-1-7-2-M	52.718	0.115	28.826	0.549	0.008	0.095	11.51	5.101	0.334				99.256
NLDL2-1-7-1-R	53.35	0.103	28.451	0.496	0.007	0.104	10.987	5.281	0.392				99.171
NLDL2-1-11-1-C	52.285	0.057	29.533	0.514	0	0.13	12.263	4.632	0.295				99.709
NLDL2-1-11-2-M	52.406	0.07	29.389	0.515	0.028	0.119	11.923	4.734	0.322				99.507
NLDL2-1-11-3-R	52.814	0.103	29.113	0.504	0.014	0.114	11.636	5.007	0.345				99.65
NLDL2-1-13-3-C	52.65	0.109	29.139	0.465	0.004	0.098	11.797	4.98	0.335				99.578
NLDL2-1-13-2-M	53.344	0.097	28.767	0.498	0.021	0.087	11.503	5.034	0.374				99.725
NLDL2-1-13-1-R	52.514	0.099	29.413	0.572	0	0.115	12.224	4.59	0.321				99.847
NLDL2-1-13PL-1	53.062	0.097	28.929	0.486	0.055	0.105	11.853	4.417	0.326	0.005	0.022	0.05	99.407
NLDL2-1-13PL-2	53.596	0.082	28.801	0.514		0.102	11.679	4.731	0.373	0.036		0.023	99.937
NLDL2-1-13PL-3	53.789	0.1	28.838	0.558		0.111	11.566	4.746	0.354	0.036	0.008		100.106
NLDL2-1-13PL-4	52.463	0.095	29.146	0.533	0.007	0.113	12.301	4.316	0.294	0.009	0.016	0.021	99.314
NLDL2-1-13PL-5	52.577	0.092	29.375	0.495	0.017	0.076	12.114	4.583	0.364		0.021		99.714
NLDL2-1-13PL-6	53.819	0.078	28.699	0.539		0.093	11.378	4.897	0.38	0.014	0.023	0.001	99.921
NLDL2-1-13PL-7	54.078	0.082	28.446	0.492		0.084	10.996	5.162	0.405	0.005	0.012	0.014	99.776
NLDL2-1-13PL-8	53.885	0.068	28.002	0.544	0.036	0.092	10.959	5.037	0.43		0.037		99.09
NLDL2-1-13PL-9	53.657	0.086	28.533	0.502		0.085	11.396	4.67	0.36	0.009	0.018	0.031	99.347
NLDL2-1-13PL-10	53.572	0.129	28.605	0.493	0.015	0.088	11.377	4.826	0.364	0.014	0.031	0.052	99.566
NLDL2-1-13PL-11	52.447	0.074	29.499	0.441		0.102	12.358	4.265	0.326	0.032	0.008	0.007	99.559
NLDL2-1-13PL-12	52.802	0.053	29.19	0.51		0.103	12.04	4.362	0.331	0.023	0.005		99.419
NLDL2-1-13PL-13	52.809	0.044	29.179	0.533		0.075	12.336	4.295	0.316	0.041	0.021		99.649
NLDL2-6-1-1-C	52.844	0.092	29.253	0.474	0	0.114	11.908	4.66	0.318				99.662
NLDL2-6-1-2-C	52.818	0.076	29.157	0.568	0.003	0.109	11.798	4.707	0.333				99.569
NLDL2-6-3-3-M	52.73	0.088	29.521	0.452	0	0.088	11.979	4.651	0.306				99.815
NLDL2-6-3-4-R	53.387	0.095	29.116	0.482	0	0.094	11.549	4.94	0.348				100.012
NLDL2-6-2-1-C	54.092	0.088	29.476	0.524	0.011	0.108	11.708	5.036	0.361				101.405
NLDL2-6-5-1-C	52.394	0.084	29.607	0.451	0	0.109	12.086	4.712	0.33				99.772
NLDL2-6-5-2-C	52.804	0.088	29.321	0.539	0.022	0.112	12.023	4.589	0.288				99.786
NLDL2-6-5-3-M	53.098	0.08	29.179	0.489	0.031	0.102	11.758	4.873	0.354				99.965
NLDL2-6-5-4-M	53.162	0.088	29.748	0.505	0	0.09	11.873	4.848	0.329				100.644
NLDL2-6-5-6-R	53.759	0.092	29.484	0.469	0.014	0.099	11.762	5.007	0.35				101.036
NLDL2-6-6-3-C	53.493	0.084	29.497	0.451	0.02	0.101	11.729	4.907	0.339				100.621
NLDL2-6-7-2-C	53.485	0.096	29.827	0.505	0	0.109	12.002	4.803	0.335				101.163
NLDL2-6-7-3-C	53.316	0.1	29.728	0.474	0	0.093	11.879	4.778	0.325				100.694
NLDL2-6-8-1-C	53.603	0.128	29.228	0.598	0.039	0.106	11.322	5.051	0.364				100.44
NLDL2-6-9-1-C	53.747	0.105	29.62	0.549	0.008	0.083	11.711	4.796	0.343				100.961
NLDL2-6-10-1-C	53.112	0.091	29.328	0.448	0	0.101	11.747	4.776	0.341				99.945
NLDL2-6-10-2-C	53.896	0.107	29.342	0.483	0	0.089	11.593	5.003	0.344				100.859
NLDL2-6-11-1-C	54.272	0.087	29.181	0.511	0	0.098	11.456	5.068	0.348				101.023
NLDL2-6-11-2-C	53.423	0.097	29.14	0.484	0.016	0.115	11.61	4.888	0.334				100.106
NLDL2-7-4-1-C	53.165	0.103	29.631	0.576	0.004	0.053	12.008	4.795	0.267				100.601
NLDL2-9-1-2-C	52.537	0.231	28.619	0.528	0	0.209	11.975	4.704	0.303				99.106
NLDL2-9-2-1-C	52.584	0.072	29.378	0.55	0	0.089	12.061	4.618	0.319				99.671
NLDL2-9-3-4-C	55.005	0.12	28.398	0.503	0	0.082	10.562	5.491	0.419				100.579
NLDL2-9-4-1-C	52.614	0.076	29.684	0.552	0.012	0.123	12.108	4.713	0.326				100.208
NLDL2-9-4-6-C	53.528	0.109	29.525	0.51	0.012	0.096	12.103	4.769	0.335				100.986
NLDL2-9-5-2-C	54.951	0.097	28.925	0.445	0.018	0.089	11.483	5.173	0.35				101.532
NLDL2-9-6-1-C	53.692	0.103	29.307	0.507	0	0.109	11.889	4.862	0.362				100.83
NLDL2-9-6-4-C	53.267	0.075	29.59	0.496	0	0.101	12.097	4.774	0.316				100.716
NLDL2-9-6-5-M	53.981	0.11	28.674	0.518	0	0.101	11.383	5.142	0.382				100.291
NLDL2-9-6-6-R	54.544	0.113	28.794	0.513	0.006	0.079	11.092	5.264	0.388				100.793
NLDL2-9-7-1-C	53.431	0.089	29.265	0.57	0	0.097	11.978	4.651	0.305				100.386
NLDL2-9-7-3-C	53.646	0.071	29.081	0.503	0	0.114	11.44	5.059	0.36				100.274
NLDL2-9-7-5-C	52.316	0.132	30.08	0.502	0	0.113	12.268	4.688	0.312				100.41
NLDL2-9-8-3-C	54.341	0.085	29.078	0.506	0.006	0.135	11.522	5.145	0.378				101.196
NLDL2-9-8-2-M	53.514	0.08	29.512	0.478	0.01	0.118	11.875	4.79	0.324				100.701
NLDL2-9-8-1-R	52.965	0.112	29.337	0.622	0.021	0.122	12.015	4.64	0.323				100.158
NLDL2-9-8-4-C	53.456	0.096	29.347	0.481	0.017	0.095	11.878	4.849	0.336				100.557
NLDL2-9-8-5-C	53.787	0.08	28.91	0.522	0.018	0.097	11.615	4.959	0.327				100.315
NLDL2-9-9-1-C	56.072	0.111	28.231	0.484	0	0.087	10.147	5.864	0.499				101.494
NLDL2-9-9-3-C	54.789	0.102	29.012	0.499	0.018	0.111	11.359	5.19	0.369				101.45
NLDL2-9-9-4-C	53.887	0.094	29.499	0.543	0	0.089	11.883	4.857	0.365				101.217
HSS01-1-1-C	51.195	0.035	29.049	0.485	0.007	0.095	12.931	4.329	0.368				98.494
HSS01-1-2-M	52.641	0.111	29.347	0.444	0.007	0.091	11.89	4.564	0.409				99.504
HSS01-1-1-R	53.233	0.101	29.551	0.451	0.033	0.103	11.581	4.831	0.427				100.311
HSS01-1-1-M	51.72	0.069	28.722	0.476	0	0.074	12.468	4.487	0.406				98.422
HSS01-1-1-R	51.554	0.026	28.667	0.509	0.027	0.079	12.308	4.668	0.476				98.314
HSS1-1PL-1	52.221	0.048	29.139	0.421		0.077	12.128	4.243	0.404	0.009	0.024	0.041	98.755
HSS1-1PL-2	51.899	0.103	29.513	0.414	0.031	0.088	12.452	4.1	0.383	0.014	0.028		99.025
HSS1-1PL-3	52.716	0.117	29.091	0.407	0.003	0.103	11.762	4.579	0.461	0.014	0.056	0.007	99.316
HSS1-1PL-4	52.072	0.085	29.13	0.396		0.101	11.979	4.307	0.428	0.027		0.038	98.563
HSS1-1PL-5	52.599	0.096	28.737	0.426		0.098	11.582	4.836	0.519	0.027	0.024		98.944
HSS1-1PL-6	53.266	0.162	28.18	0.569		0.105	10.984	4.975	0.547		0.03		98.818
HSS01-2-1-C	53.591	0.091	29.083	0.481	0	0.094	11.405	4.895	0.434				100.073
HSS01-3-3-C	52.277	0.117	29.006	0.438	0.01	0.095	11.693	4.653	0.42				98.709
HSS01-3-4-C	53.056	0.11	29.234	0.53	0	0.089	11.645	4.8	0.415				99.878
HSS01-5-1-C	53.263	0.105	28.988	0.462	0.028	0.104	11.288	4.895	0.455				99.588
HSS01-6-2-C	52.135	0.112	29.581	0.541	0	0.111	11.948	4.135	0.383				98.947
HSS01-7-1-C	52.058	0.087	29.325	0.457	0	0.066	12.089	4.437	0.349				98.868
HSS01-8-1-C	52.228	0.102	29.655	0.465	0.007	0.089	12.016	4.594	0.392				99.549
HSS01-9-1-C	52.038	0.093	29.743	0.47	0	0.088	12.204	4.524	0.37				99.53
HSS01-10-1-C	53.098	0.121	28.82	0.49	0.005	0.103	11.499	4.918	0.462				99.516
HSS01-11-1-C	52.466	0.099	29.663	0.468	0.006	0.102	11.947	4.702	0.402				99.855
HSS01-12-1-C	52.471	0.099	29.886	0.508	0.018	0.092	12.187	4.524	0.365				100.15
HSS01-12-1-M	51.81	0.094	29.658	0.494	0	0.08	11.995	4.55	0.4				99.082
HSS01-12-1-R	53.34	0.114	29.112	0.481	0.028	0.085	11.441	4.884	0.412				99.898
HSS02-1-1-C	54.31	0.107	28.841	0.43	0.024	0.086	11.271	4.908	0.485				100.461
HSS02-2-1-C	53.473	0.104	29.816	0.449	0	0.072	11.994	4.661	0.42				100.989
HSS02-3-1-C	53.517	0.102	29.474	0.469	0	0.087	11.881	4.753	0.404				100.688
HSS02-4-1-C	53.274	0.105	29.41	0.475	0	0.075	11.736	4.787	0.432				100.293
HSS02-6-1-C	52.066	0.1	29.156	0.512	0	0.099	11.669	4.634	0.422				98.658
HSS02-7-1-C	53.443	0.113	29.65	0.446	0.034	0.078	11.937	4.683	0.402				100.786
HSS02-8-1-C	53.237	0.105	29.434	0.437	0.009	0.086	12.007	4.548	0.404				100.268
HSS02-4-1-pl-C	52.916	0.061	28.718	0.427	0.057	0.085	12.268	4.279	0.384	0	0.009	0.046	99.25
HSS02-4-1-pl-R	52.952	0.076	28.39	0.536	0.043	0.064	12.165	4.397	0.42	0.013	0.068	0.067	99.191
HSS04-4-2-C	52.888	0.089	29.594	0.41	0	0.073	11.925	4.732	0.433				100.145
HSS04--4-2-pl-C	54.106	0.075	28.165	0.521	0.056	0.087	11.702	4.535	0.444	0.077	0.004	0.002	99.774
HSS04--4-2-pl-R	53.119	0.055	27.876	0.624	0	0.042	12.036	4.149	0.32	0	0.027	0	98.248
HSS05-2-1-C	52.444	0.11	29.88	0.5	0.026	0.074	12.897	4.772	0.333				101.037
HSS05-2-2-C	53.94	0.126	29.373	0.423	0	0.092	11.859	4.884	0.435				101.132
HSS05-2-2-pl-R	53.324	0.111	28.359	0.405	0	0.041	12.038	4.404	0.283	0.038	0.003	0	99.006
HSS05-3-1-C	53.54	0.096	29.645	0.461	0	0.073	12.428	4.624	0.411				101.278
HSS05-4-2-C	53.15	0.117	30.022	0.558	0.009	0.065	11.888	4.796	0.381				100.988
HSS05-4-3-C	53.797	0.105	29.764	0.478	0	0.071	12.165	4.613	0.39				101.383
HSS05-4-4-C	53.264	0.103	29.507	0.438	0	0.081	12.106	4.72	0.413				100.632
HSS05-5-3-C	53.432	0.097	29.623	0.456	0	0.067	11.728	4.736	0.407				100.545
HSS05-5-3-M	52.683	0.019	29.585	0.528	0	0.08	13.05	4.346	0.398				100.69
HSS05-5-3-R	51.834	0.016	29.867	0.542	0.01	0.064	13.154	4.212	0.293				99.993
HSS05-5-3-C	53.296	0.049	29.351	0.471	0	0.064	12.573	4.532	0.389				100.724
HSS05-5-2-M	52.824	0.088	29.975	0.499	0.016	0.08	12.046	4.577	0.373				100.479
HSS05-5-1-R	53.143	0.108	29.839	0.502	0	0.082	12.007	4.587	0.392				100.66
HSS05-6-1-C	52.375	0.092	29.786	0.475	0.012	0.071	12.129	4.382	0.35				99.671
HSS05-6-4-M	53.31	0.032	28.578	0.561	0.021	0.079	12.145	4.904	0.445				100.074
HSS05-6-4-C	52.106	0.055	29.628	0.467	0.011	0.103	13.133	4.377	0.374				100.254
HSS05-6-4-M	52.468	0.088	30.11	0.485	0.005	0.075	12.169	4.557	0.373				100.33
HSS05-6-4-R	52.712	0	29.071	0.73	0	0.06	12.514	4.612	0.357				100.056
HSS05-7-1-C	52.51	0.081	30.178	0.501	0	0.067	12.157	4.499	0.331				100.326
HSS05-2-2-pl-C	54.045	0.092	28.252	0.51	0	0.047	12.148	4.5	0.399	0.045	0.028	0	100.066
HSS05-6-4-pl-C	52.853	0.057	29.057	0.423	0	0.061	12.779	3.981	0.32	0	0	0.015	99.546
HSS05-6-4-pl-R	54.592	0.102	28.525	0.583	0.062	0.057	12.021	4.33	0.361	0.051	0.044	0.006	100.734
HSS06-1-1-M	53.66	0.087	30.018	0.538	0	0.081	12.179	4.83	0.582				101.975
HSS06-1-1-pl-R	55.13	0.159	27.723	0.669	0	0.111	11.075	4.887	0.545	0.026	0.033	0.003	100.361
HSS06-3-2-C	53.278	0.095	30.337	0.485	0.024	0.08	12.463	4.47	0.389				101.621
HSS06-4-1-C	54.496	0.1	29.43	0.499	0	0.077	11.715	4.869	0.442				101.628
HSS06-7-1-C	53.173	0.089	29.633	0.46	0.003	0.081	12.418	4.478	0.391				100.726
HSS06-1-1-pl-C	53.916	0.055	28.659	0.52	0	0.122	12.066	4.421	0.406	0.058	0	0	100.223
HSS07-1-1-C	52.46	0.125	29.059	0.479	0	0.085	11.691	4.826	0.435				99.159
HSS07-1-PL-M	54.245	0.059	27.735	0.437	0	0.079	11.749	4.563	0.398	0.006	0.017	0	99.288
HSS07-1-PL-R	53.83	0.112	27.938	0.752	0.002	0.019	11.623	4.638	0.29	0.077	0.017	0	99.298
HSS07-3-1-C	52.528	0.091	29.108	0.431	0.01	0.064	11.607	4.855	0.405				99.099
HSS07-4-1-C	52.452	0.114	28.943	0.448	0	0.087	11.424	4.831	0.426				98.725
HSS07-5-1-C	52.807	0.1	28.952	0.495	0.024	0.145	11.506	4.811	0.398				99.238
HSS07-6-1-C	52.359	0.108	28.887	0.43	0	0.086	11.544	4.951	0.485				98.851
HSS07-9-4-C	53.395	0.098	28.846	0.482	0	0.072	11.275	4.976	0.427				99.571
HSS07-9-4-pl-R	52.968	0.096	28.625	0.447	0.049	0.027	12.367	4.435	0.26	0.064	0.019	0	99.357
HSS07-11-2-C	52.871	0.09	29.176	0.54	0.013	0.086	12.076	4.701	0.363				99.916
HSS07-13-3-C	52.051	0.11	29.763	0.499	0	0.061	12.294	4.401	0.363				99.541
HSS07-13-2-M	52.326	0.09	29.202	0.532	0.029	0.093	11.533	4.827	0.435				99.07
HSS07-13-1-R	51.825	0.096	29.624	0.52	0.019	0.074	12.171	4.411	0.376				99.116
HSS07-14-1-C	52.862	0.103	29.144	0.481	0.01	0.059	11.837	4.583	0.34				99.418
HSS07-11-2-pl-C	53.296	0.087	28.682	0.454	0	0.097	12.373	4.179	0.346	0	0.023	0.012	99.549
HSS07-11-2-pl-C	53.595	0.097	27.799	0.622	0.038	0.008	11.883	4.502	0.296	0	0.019	0	98.859
HSS07-1-PL-C	54.147	0.061	28.093	0.493	0	0.075	11.773	4.269	0.447	0	0.018	0	99.376
HSS07-9-4-pl-C	54.649	0.09	28.259	0.562	0.062	0.08	11.473	4.503	0.465	0	0.051	0	100.194
HSS08-1-1-C	51.42	0.107	29.179	0.524	0.007	0.098	12.26	4.696	0.379				98.672
HSS08-1-2-C	51.434	0.128	29.422	0.466	0	0.085	12.305	4.598	0.394				98.833
HSS08-2PL-1	54.146	0.124	28.922	0.521		0.052	11.505	4.821	0.483		0.044	0.021	100.639
HSS08-2PL-2	54.065	0.06	28.67	0.533		0.052	11.083	4.951	0.502		0.017	0.089	100.022
HSS08-2PL-3	54.305	0.11	28.761	0.445	0.053	0.068	11.101	4.957	0.491		0.035		100.326
HSS08-2PL-4	54.492	0.136	28.424	0.52	0.025	0.08	10.979	5.056	0.551				100.263
HSS08-2PL-5	53.07	0.131	29.311	0.588		0.095	12.099	4.452	0.439	0.005	0.037	0.014	100.241
HSS08-2PL-6	52.895	0.164	28.992	0.621		0.111	11.767	4.415	0.448	0.032	0.021		99.466
HSS08-4-1-C	53.046	0.115	28.478	0.521	0	0.084	11.48	5.015	0.446				99.184
HSS08-8-1-C	53.033	0.115	27.57	0.505	0.007	0.095	11.714	4.909	0.425				98.373
HSS08-9-1-C	52.254	0.126	29.445	0.481	0.006	0.09	12.177	4.571	0.385				99.535
HSS08-9-2-C	52.204	0.05	29.719	0.46	0	0.095	12.414	4.52	0.382				99.843
HSS08-10-1-C	52.546	0.119	29.418	0.47	0	0.1	12.202	4.681	0.388				99.924
HSS08-10-2-C	53.169	0.147	28.872	0.511	0	0.091	11.635	5.097	0.432				99.954
HSS08-11-2-C	52.118	0.073	29.811	0.506	0.003	0.075	12.622	4.455	0.342				100.005
HSS08-11-ol-C	54.509	0.092	28.111	0.467	0.025	0.082	11.536	4.446	0.42	0.032	0	0	99.72
HSS08-11-ol-R	54.237	0.044	28.832	0.45	0.051	0.065	12.243	4.161	0.359	0.006	0.039	0	100.487
HSS08-12-1-C	53.046	0.104	28.95	0.479	0.003	0.088	11.483	5.017	0.429				99.6
HSS08-12-1-pl-C	54.317	0.103	28.022	0.522	0	0.071	11.671	4.68	0.474	0	0.008	0	99.868
HSS08-12-1-pl-R	53.982	0.113	27.747	0.709	0	0.103	11.638	4.613	0.447	0.128	0.007	0.018	99.505
HNB1-1-2-1-C	52.443	0.099	29.581	0.499	0.012	0.077	12.002	4.68	0.387				99.78
HNB1-1-3-1-C	53.272	0.102	29.466	0.471	0	0.085	11.701	4.689	0.425				100.209
HNB1-1-3-2-C	53.179	0.098	29.3	0.394	0	0.088	11.656	4.838	0.407				99.961
HNB1-1-3-3-M	53.426	0.097	29.255	0.489	0.001	0.082	11.731	4.789	0.406				100.277
HNB1-1-3-4-R	52.302	0.098	29.272	0.444	0	0.075	11.917	4.57	0.386				99.063
HNB1-1-4-1-C	52.605	0.124	29.744	0.483	0	0.108	12.111	4.657	0.364				100.197
HNB1-1-4-2-C	52.504	0.089	28.384	0.484	0	0.092	12.448	4.586	0.382				98.968
HNB1-1-5-3-C	51.944	0.105	29.538	0.525	0.005	0.083	12.11	4.61	0.403				99.323
HNB1-1-6-2-C	52.662	0.099	29.678	0.554	0.015	0.081	12.094	4.597	0.404				100.185
HNB1-1-7-1-C	51.888	0.104	29.682	0.475	0	0.098	12.029	4.59	0.373				99.238
HNB1-1-7-2-C	52.5	0.109	29.85	0.51	0	0.099	12.054	4.56	0.402				100.083
HNB1-1-5-3-PL-C	52.959	0.1	29.939	0.402	0.031	0.098	12.534	4.204	0.404	0	0.019	0.051	100.741
HNB1-2-1-1-C	52.57	0.103	30.129	0.472	0.024	0.075	12.208	4.51	0.38				100.47
HNB1-2-1-2-C	52.771	0.101	29.573	0.481	0.049	0.094	11.649	4.725	0.427				99.87
HNB1-2-1-4-C	52.904	0.082	29.88	0.505	0.002	0.096	12.094	4.55	0.404				100.517
HNB1-2-2-1-C	53.276	0.107	29.295	0.47	0.002	0.075	12.209	4.462	0.4				100.296
HNB1-2-2PL-1	53.097	0.102	29.141	0.451	0.003	0.096	11.747	4.5	0.435	0.032	0.02	0.065	99.689
HNB1-2-2PL-2	52.556	0.102	29.364	0.502		0.101	12.17	4.372	0.408	0.045	0.053	0.058	99.731
HNB1-2-2PL-3	52.803	0.048	29.367	0.423		0.091	11.815	4.534	0.414				99.495
HNB1-2-2PL-4	52.836	0.092	29.106	0.516	0.023	0.079	11.818	4.536	0.421	0.027	0.029	0.01	99.493
HNB1-2-2PL-5	52.759	0.113	29.261	0.504		0.064	11.964	4.507	0.425		0.019	0.037	99.653
HNB1-2-2PL-6	52.002	0.114	29.863	0.499	0.023	0.068	12.585	4.139	0.359		0.027	0.004	99.683
HNB1-2-3-1-C	52.074	0.128	29.95	0.455	0.003	0.102	11.989	4.618	0.374				99.694
HNB1-2-3-2-C	53.151	0.098	29.598	0.499	0.016	0.079	11.74	4.643	0.411				100.236
HNB1-2-4-1-C	52.576	0.118	29.878	0.476	0	0.063	12.16	4.566	0.369				100.206
HNB1-2-4-5-C	53.183	0.106	29.591	0.478	0.02	0.072	11.707	4.724	0.429				100.31
HNB1-2-5-1-C	52.453	0.109	29.874	0.486	0	0.079	12.239	4.638	0.392				100.271
HNB1-2-5-1-C	51.512	0.031	29.264	0.454	0.019	0.066	13.095	4.306	0.364				99.111
HNB1-2-5-1-M	51.741	0.033	29.058	0.72	0.01	0.091	12.946	4.327	0.363				99.289
HNB1-2-5-1-R	51.741	0.033	29.058	0.72	0.01	0.091	12.946	4.327	0.363				99.289
HNB1-1-5-3-PL-R	55.132	0.168	28.374	0.841	0.029	0.123	11.047	4.707	0.522	0.091	0.062	0.013	101.109
HNB1-2-6-1-C	53.294	0.093	29.636	0.479	0.023	0.08	11.897	4.604	0.397				100.503
HNB1-2-6-1-C	52.027	0.026	28.877	0.478	0.013	0.103	12.711	4.442	0.392				99.068
HNB1-2-6-2-C	52.843	0.092	29.392	0.472	0.013	0.078	11.832	4.74	0.419				99.882
HNB1-2-6-PL-R	53.645	0.127	28.714	0.709	0.008	0.087	12.153	4.432	0.363	0	0.011	0	100.249
HNB1-2-6-PL-C	53.555	0.073	28.379	0.366	0	0.043	12.072	4.121	0.408	0.032	0.008	0.001	99.058
HNB1-2-6-1-M	52.218	0.027	28.743	0.463	0.028	0.081	12.422	4.624	0.416				99.022
HNB1-2-6-1-R	52.103	0.031	28.958	0.58	0.024	0.086	12.777	4.442	0.384				99.385
HNB1-5-2-1-C	52.177	0.095	29.661	0.455	0.012	0.084	11.937	4.599	0.394				99.413
HNB1-5-2-1-cpx-C	53.417	0.088	28.267	0.453	0	0.067	12.074	4.286	0.372	0	0.01	0	99.034
HNB1-5-2-1-cpx-R	53.463	0.1	27.448	0.696	0.057	0.104	12.115	4.157	0.401	0.07	0	0.044	98.655
HNB1-5-3-2-C	51.805	0.098	29.44	0.474	0	0.083	12.042	4.547	0.43				98.919
HNB1-5-3-3-C	53.187	0.112	28.895	0.477	0.014	0.103	11.399	4.998	0.442				99.627
HNB1-5-3-3-pl-R	54.101	0.116	28.374	0.554	0.019	0.101	11.923	4.332	0.422	0.026	0	0.029	99.997
HNB1-5-5-6-C	52.234	0.102	29.347	0.454	0	0.081	11.682	4.759	0.404				99.063
HNB1-5-7-2-C	51.984	0.104	29.436	0.493	0	0.075	11.992	4.572	0.371				99.027
HNB1-5-8-1-C	52.452	0.116	29.906	0.528	0.005	0.087	11.994	4.54	0.378				100.008
HNB1-5-9-2-C	52.218	0.092	29.589	0.462	0.004	0.092	12.188	4.609	0.384				99.638
HNB1-5-10-3-C	52.177	0.09	29.984	0.497	0.006	0.073	12.257	4.527	0.386				99.996
HNB1-5-3-3-pl-C	53.575	0.052	27.899	0.495	0.024	0.094	12.023	4.153	0.398	0.077	0	0	98.79
HNB1-5-8-pl-C	53.115	0.079	28.919	0.509	0	0.076	12.506	4.111	0.364	0.077	0.026	0.035	99.817
HNB1-5-8-pl-R	53.671	0.075	27.793	0.545	0	0.081	11.553	4.699	0.459	0.039	0	0.049	98.964
HNB-ZM-2-1-C	53.258	0.105	29.966	0.416	0.012	0.074	12.023	4.575	0.387				100.816
HNB-ZM-2-4-C	54.003	0.114	29.475	0.485	0	0.077	11.854	4.796	0.446				101.248
HNB-ZM-2-C	53.258	0.105	29.966	0.416	0.012	0.074	12.023	4.575	0.387				100.816
HNB-ZM-2-2-M	53.093	0.085	29.615	0.421	0	0.063	11.94	4.718	0.409				100.344
HNB-ZM-2-3-R	54.49	0.098	29.43	0.48	0.009	0.081	11.763	4.804	0.478				101.633
HNB-ZM-4-1-C	52.542	0.104	29.788	0.476	0	0.086	12.238	4.435	0.378				100.048
HNB-ZM-6-1-C	52.944	0.102	29.563	0.516	0.029	0.066	12.165	4.57	0.406				100.362
HNB-ZM-7-1-C	52.779	0.111	29.532	0.466	0	0.076	11.959	4.479	0.447				99.849
HNB-ZM-4-pl-C	54.123	0.083	27.484	0.371	0	0.087	11.514	4.63	0.473	0.045	0.04	0	98.85
HNB-ZM-10-1-C	50.502	0.024	29.489	0.452	0	0.097	13.119	4.253	0.388				98.323
HNB-ZM-10-1-M	51.433	0	28.92	0.496	0.021	0.083	12.45	4.55	0.427				98.38
HNB-ZM-10-1-R	51.601	0.023	29.08	0.481	0	0.081	12.905	4.361	0.406				98.937
HS1-1-8-1-pl-C	54.064	0.165	29.822	0.546	0	0.057	12.003	4.233	0.425	0	0.031	0.002	101.348
HS1-1-8-1-pl-R	54.101	0.121	29.821	0.644	0	0.065	12.038	4.587	0.424	0	0.064	0	101.865
HS1-1-9-1-pl-C	54.081	0.12	29.258	0.493	0.008	0.104	11.916	4.706	0.417	0.039	0.067	0	101.209
HS03-10-pl-C	53.85	0.146	29.694	0.609	0.018	0.086	12.283	4.088	0.387	0.019	0	0	101.18
HS03-11-PL-C	53.676	0.097	29.396	0.736	0.021	0.089	12.221	4.329	0.444	0.052	0.029	0	101.09
HS03-11-PL-R	53.865	0.157	29.413	0.585	0	0.08	11.928	4.61	0.472	0.026	0.064	0	101.2
HS03-10PL-1	52.954	0.123	29.137	0.604		0.123	11.981	4.513	0.459	0.096	0.086	0.003	100.079
HS03-10PL-2	53.052	0.213	29.136	0.666	0.022	0.095	11.897	4.472	0.402		0.023	0.022	100
HS03-10PL-3	53.484	0.102	29.025	0.597	0.028	0.072	11.612	4.737	0.443		0.067	0.049	100.216
HS03-10PL-4	51.843	0.116	30.091	0.448		0.083	12.848	4.075	0.338			0.005	99.847
HS03-10PL-5	52.756	0.16	29.293	0.616		0.068	11.99	4.499	0.415	0.014	0.023		99.834
HS03-10PL-6	52.458	0.129	29.363	0.755	0.002	0.11	12.2	4.264	0.443	0.032	0.019	0.001	99.776
HS03-10PL-7	52.996	0.144	29.319	0.919		0.089	12.009	4.325	0.466	0.018	0.061	0.055	100.401
HS03-10PL-8	53.709	0.221	28.094	0.98		0.106	11.014	4.684	0.662		0.299		99.769
HS03-10-pl-R	53.623	0.161	29.703	0.668	0.024	0.067	12.286	4.283	0.408	0.032	0.016	0	101.271

## Sheet: Table S5
Table S5 Corrected primitive melt compositions of WVF basalts by inverse fractional crystallization
Volcano	Beiliandanlu						Zhongliandanlu					Nanliandanlu					Huoshaoshan						Heinaobao				Hongshan
Sample	BLDL1-2	BLDL01-8	BLDL-1-4	BLDL-1-7	BLDL-1-10	BLDL-1-11	ZLDL1-3	ZLDL01-6	ZLDL3-1	ZLDL3-2	ZLDL3-3	NLDL1-1	NLDL01-2	NLDL-2-1	NLDL2-6	NLDL2-9	HSS01	HSS02	HSS05	HSS06	HSS07	HSS08	HNB-1-1	HNB-1-2	HNB-1-5	HNB-ZM	HS01-1	HS01-2	HS03	HS04	HS05
SiO2	47.9801	48.0208	47.6307	47.7415	47.9072	47.8526	47.9418	48.0556	48.5699	49.081	48.5607	49.893	49.5909	49.3799	50.5195	50.1958	48.9356	49.5832	50.4667	50.3265	50.225	49.9659	49.4162	49.8113	49.6443	49.9872	47.6175	47.7471	48.5197	49.0813	48.7102
TiO2	2.48257	2.46803	2.60255	2.60351	2.58028	2.60496	2.4776	2.46035	2.52426	2.43894	2.51469	2.18174	2.21885	2.29023	2.18173	2.19351	2.54837	2.42583	2.37179	2.3149	2.40668	2.4118	2.51319	2.42917	2.47965	2.39729	2.60016	2.5946	2.53875	2.4737	2.53282
Al2O3	16.2302	16.1493	16.1281	16.2107	16.1635	16.266	16.1789	15.8825	16.6339	16.5817	16.6827	15.1222	15.0256	15.1013	15.4562	15.1522	16.1182	16.4687	16.4646	16.3335	16.0364	16.0081	16.5526	16.6367	16.4982	16.7619	16.2589	16.283	16.3117	16.1395	16.2054
Cr2O3	0.002021	0.00201987	0.00199332	0.00185311	0.00201702	0.00185534	0.00536281	0.00536293	0.00479709	0.00522415	0.00523147	0.0226155	0.0240935	0.0121554	0.0200398	0.0211475	0	0	0	0	0	0	0.00243178	0.00248251	0.00269886	0.00194098	0.00963801	0.00892702	0.00826934	0.00830345	0.00826748
Fe2O3	1.57412	1.58242	1.99822	2.00135	1.97782	1.98801	1.92274	1.9199	3.32844	3.32002	3.31726	2.05527	2.05029	2.18404	2.91484	2.3791	1.70921	1.66148	1.59203	1.57754	1.64121	1.65308	1.71572	1.64006	1.70409	1.64247	1.69398	1.70467	1.66481	1.64872	1.66036
FeO	8.39446	8.43659	8.51562	8.49125	8.43759	8.43835	8.11234	8.09967	7.04738	7.06762	7.0591	8.70302	8.71399	8.99058	7.70371	8.38067	9.11124	8.74529	8.35418	8.19042	8.72947	8.74479	8.9786	8.5943	8.96668	8.52222	8.99073	9.00736	8.7658	8.68386	8.74392
MnO	0.141482	0.141372	0.132716	0.133393	0.133293	0.134625	0.147727	0.146998	0.148656	0.148042	0.154008	0.150639	0.151671	0.146192	0.147583	0.151947	0.137211	0.144317	0.146183	0.142326	0.13393	0.133731	0.140584	0.148845	0.140323	0.147661	0.137844	0.138271	0.135467	0.137198	0.137436
MgO	4.89585	4.9133	4.97404	4.91976	4.89841	4.88665	5.41544	5.42346	4.69599	4.70478	4.73025	6.40535	6.43533	6.61799	5.71062	6.16909	4.94452	4.70272	4.49388	4.43138	4.73662	4.73027	4.74335	4.61467	4.73145	4.5061	4.83228	4.77153	4.62473	4.59812	4.6106
CaO	8.31475	8.30464	8.17946	8.15689	8.23567	8.13978	9.19759	9.19848	8.23137	8.18185	8.29529	8.65415	8.73622	8.6899	8.45018	8.48044	9.18776	8.35024	8.11126	8.85381	8.26346	8.73846	8.05044	8.24943	8.02282	8.05674	7.94987	7.95748	7.94378	7.91199	7.91601
Na2O	5.40665	5.4014	5.17386	5.13843	5.02951	5.08657	4.94034	5.09698	5.07721	4.81299	4.90861	4.22683	4.38999	4.12036	4.3576	4.29741	4.19366	4.78007	4.96035	4.67281	4.63996	4.434	4.65023	4.81772	4.4639	4.68794	5.04587	5.03992	4.80213	4.67251	4.81141
K2O	2.82385	2.82181	2.88669	2.89311	2.86367	2.88848	2.63625	2.69101	2.69506	2.63626	2.68653	1.64662	1.68849	1.7115	1.64549	1.68247	2.36105	2.36824	2.2914	2.41647	2.44348	2.43393	2.42512	2.25481	2.52913	2.4943	2.75227	2.72849	2.77326	2.75506	2.7597
P2O5	1.75394	1.75831	1.77607	1.70828	1.77096	1.71207	1.02387	1.01968	1.04301	1.0215	1.08562	0.938592	0.974544	0.755863	0.892523	0.896223	0.75316	0.769932	0.7476	0.740415	0.743813	0.745861	0.811506	0.800509	0.816736	0.794212	2.11098	2.01874	1.91155	1.88978	1.90389
Total	100	100	100	100	100	100	100	100	100	100	100	100	100	100	100	100	100	100	100	100	100	100	100	100	100	100	100	100	100	100	100
