# Supplementary material for: A snapshot of the transition from monogenetic volcanoes to composite volcanoes: case study on the Wulanhada Volcanic Field (northern China)
Source: Copernicus journal article supplement (doi:10.5194/ejm-34-469-2022), 2022-10-20
Supplement: Supplementary file 2 [file ejm-34-469-2022-supplement.zip]

Archive with 2 entries (2 files):
- Supplementary Tables.xlsx
- ejm-34-469-2022-supplement-title-page.pdf
